# Supplementary material for: Synthesis of aromatic β-keto esters via a carbonylative Suzuki–Miyaura coupling reaction of α-iodo esters with arylboronic acids
Source: Royal Society of Chemistry journal article supplement (doi:10.1039/c5qo00185d), 2015-01-01

## Supporting Information

Synthesis of Aromatic  $\beta$ -Keto Esters via a Carbonylative Suzuki-Miyaura Coupling  
Reaction of  $\alpha$ -Iodo Esters with Arylboronic Acids

Shuhei Sumino, Takahito Ui, and Ilhyong Ryu\*

Department of Chemistry, Graduate School of Science, Osaka Prefecture University  
1-1, Gakuen-Cho, Naka-Ku, Sakai, Osaka 599-8531, Japan

[ryu@c.s.osakafu-u.ac.jp](mailto:ryu@c.s.osakafu-u.ac.jp)

### Table of Contents

|                                                                                                            |           |
|------------------------------------------------------------------------------------------------------------|-----------|
| <b>General Information</b> .....                                                                           | <b>2</b>  |
| <b>Typical Procedure for the Synthesis of 3a in Light Conditions</b> .....                                 | <b>3</b>  |
| <b>Typical Procedure for the Synthesis of 3a in Thermal Conditions</b> .....                               | <b>3</b>  |
| <b>Spectral Data</b> .....                                                                                 | <b>4</b>  |
| <b>Spectra (<math>^1\text{H}</math>, <math>^{13}\text{C}</math>, and <math>^{19}\text{F}</math>)</b> ..... | <b>10</b> |

## General Information

Thin layer chromatography (TLC) was performed on Merck precoated plates (silica gel 60 F254, Art 5715, 0.25 mm) and were visualized by fluorescence quenching under UV light or by staining with *p*-anisaldehyde/AcOH/H<sub>2</sub>SO<sub>4</sub>/EtOH, or 12MoO<sub>3</sub>.H<sub>3</sub>PO<sub>4</sub>/EtOH. The products were purified by flash chromatography on silica gel (Kanto Chem. Co. Silica Gel 60N (spherical, neutral, 40-50 mm)) and, if necessary, were further purified by recycling preparative HPLC (Japan Analytical Industry Co. Ltd., LC-918) equipped with GPC columns (JAIGEL-1H + JAIGEL-2H columns) using CHCl<sub>3</sub> as eluent. <sup>1</sup>H NMR spectra were recorded with a JEOL JMN-ECS400 (400 MHz) spectrometer and referenced to the solvent peak at 7.26 ppm. <sup>13</sup>C NMR spectra were recorded with a JEOL JMN-ECS400 (100 MHz) spectrometer and referenced to the solvent peak at 77.16 ppm. <sup>19</sup>F NMR spectra were recorded with a JEOL JMN-ECS400 (376 MHz) spectrometer. All the fluorine NMR spectra were calibrated using CF<sub>3</sub>COOH (-76.55 ppm). Splitting patterns are indicated as follows: br, broad; s, singlet; d, doublet; t, triplet; q, quartet; m, multiplet. Infrared spectra were recorded on a JASCO FT/IR-4100 spectrometer and are reported as wavenumber (cm<sup>-1</sup>). High-resolution mass spectra were recorded with a JEOL MS700 spectrometer. Benzene was not distilled for this reaction.

### Typical Procedure for the Synthesis of **3a** in Light Conditions

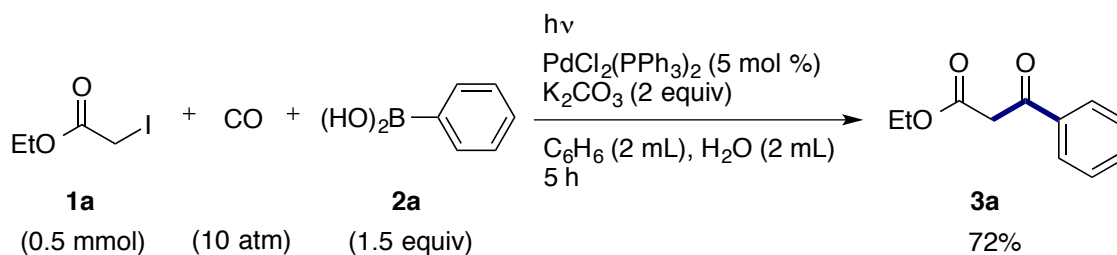

A magnetic stirring bar, **1a** (121.9 mg, 0.5 mmol), **2a** (91.7 mg, 0.75 mmol), PdCl<sub>2</sub>(PPh<sub>3</sub>)<sub>2</sub> (17.4 mg, 0.025 mmol), K<sub>2</sub>CO<sub>3</sub> (139.1 mg, 1.0 mmol), C<sub>6</sub>H<sub>6</sub> (2 mL) and H<sub>2</sub>O (2 mL) were placed in a stainless steel autoclave for photoreaction equipped with an inserted Pyrex glass liner. The autoclave was closed, purged three times with carbon monoxide, pressurized with 10 atm of CO and then irradiated by black light (15 W × 2) with stirring for 5 h. Excess CO was discharged at room temperature after the reaction. The reaction mixture was added to water (20 mL) and extracted with ether (20 mL × 3). The organic layer was washed with brine, and dried over MgSO<sub>4</sub>, then filtered and concentrated *in vacuo* to give a residue, which was subjected to silica gel column chromatography using hexane/EtOAc = 30/1 as eluent affording **3a** (69.2 mg, 72%).

### Typical Procedure for the Synthesis of **3a** in Thermal Conditions

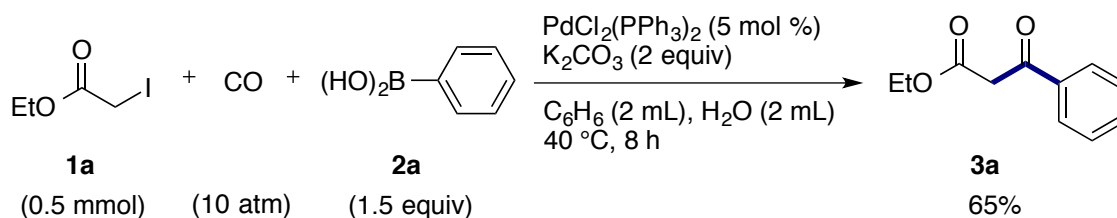

A magnetic stirring bar, **1a** (120.5 mg, 0.5 mmol), **2a** (91.1 mg, 0.75 mmol), PdCl<sub>2</sub>(PPh<sub>3</sub>)<sub>2</sub> (17.8 mg, 0.025 mmol), K<sub>2</sub>CO<sub>3</sub> (138.1 mg, 1.0 mmol), C<sub>6</sub>H<sub>6</sub> (2 mL) and H<sub>2</sub>O (2 mL) were placed in a stainless steel autoclave. The autoclave was closed, purged three times with CO, pressurized with 10 atm of CO and then heated in 40 °C for 8 h. Excess CO was discharged at room temperature after the reaction. The reaction mixture was added to water (20 mL) and extracted with ether (20 mL × 3). The organic layer was washed with brine, and dried over MgSO<sub>4</sub>, then filtered and concentrated *in vacuo* to give a residue, which was subjected to silica gel column chromatography using hexane/EtOAc = 30/1 as eluent affording **3a** (62.3 mg, 65%).

## Spectral Data

### Ethyl 3-oxo-3-phenylpropanoate (3a)

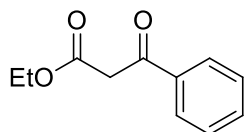

This product is commercially available.

Light brown oil;  $^1\text{H-NMR}$  ( $\text{CDCl}_3$ , 400 MHz)  $\delta$  Keto Form 7.96-7.94 (m, 2H), 7.62-7.59 (m, 1H), 7.51-7.47 (m, 2H), 4.22 (q,  $J = 7.2$  Hz, 2H), 4.00 (s, 2H), 1.26 (t,  $J = 7.2$  Hz, 3H), Enol Form 12.58 (s, 1H), 7.79-7.77 (m, 2H), 7.47-7.41 (m, 3H), 5.67 (s, 1H), 4.27 (q,  $J = 7.2$  Hz, 2H), 1.34 (t,  $J = 7.2$  Hz, 3H);  $^{13}\text{C-NMR}$  ( $\text{CDCl}_3$ , 100 MHz)  $\delta$  Keto Form 192.67, 167.65, 136.11, 133.85, 128.89, 128.61, 61.59, 46.11, 14.18, Enol Form 173.32, 171.54, 133.54, 131.35, 128.61, 126.15, 87.49, 60.44, 14.41.

### Ethyl 3-oxo-3-(*p*-tolyl)propanoate (3b)

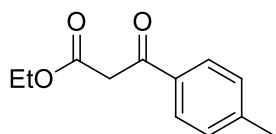

Colorless oil;  $^1\text{H-NMR}$  ( $\text{CDCl}_3$ , 400 MHz)  $\delta$  Keto Form 7.86-7.84 (m, 2H), 7.29-7.27 (m, 2H), 4.21 (q,  $J = 7.6$  Hz, 2H), 3.97 (s, 2H), 2.42 (s, 3H), 1.26 (t,  $J = 7.6$  Hz, 3H), Enol Form 12.58 (s, 1H), 7.69-7.67 (m, 2H), 7.24-7.21 (m, 2H), 5.64 (s, 1H), 4.26 (q,  $J = 6.8$  Hz, 2H), 2.40 (s, 3H), 1.33 (t,  $J = 6.8$  Hz, 3H);  $^{13}\text{C-NMR}$  ( $\text{CDCl}_3$ , 100 MHz)  $\delta$  Keto Form 192.21, 167.71, 144.74, 133.61, 129.50, 128.85, 61.45, 45.98, 21.73, 14.12, Enol Form 173.34, 171.65, 141.77, 130.65, 129.30, 126.03, 86.66, 60.27, 21.51, 14.36; IR (neat) 2984  $\text{cm}^{-1}$ , 1746  $\text{cm}^{-1}$ , 1682  $\text{cm}^{-1}$ ; MS (relative intensity)  $m/z$  206 ( $\text{M}^+$ , 77), 119 (100), 91 (70); HRMS (EI)  $m/z$  calcd for  $\text{C}_{12}\text{H}_{14}\text{O}_3$  206.0943, found 206.0948.

### Ethyl 3-(4-methoxyphenyl)-3-oxopropanoate (3c)

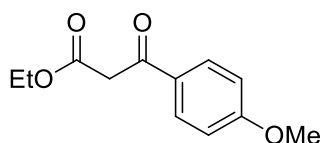

Light brown oil;  $^1\text{H-NMR}$  ( $\text{CDCl}_3$ , 400 MHz)  $\delta$  Keto Form 7.95-7.92 (m, 2H), 6.97-6.94 (m, 2H), 4.21 (q,  $J = 7.2$  Hz, 2H), 3.95 (s, 2H), 3.88 (s, 3H), 1.26 (t,  $J = 7.2$  Hz, 3H), Enol Form 12.64 (s, 1H), 7.75-7.73 (m, 2H), 6.94-6.91 (m, 2H), 5.58 (s, 1H), 4.26 (q,  $J = 7.2$  Hz, 2H),

3.85 (s, 3H), 1.33 (t,  $J = 7.2$  Hz, 3H);  $^{13}\text{C}$ -NMR ( $\text{CDCl}_3$ , 100 MHz)  $\delta$  Keto Form 191.10, 167.87, 164.09, 131.00, 129.20, 114.03, 61.51, 55.63, 45.93, 14.20, Enol Form 173.47, 171.49, 162.21, 132.32, 125.88, 113.55, 85.80, 60.26, 55.50, 14.44; IR (neat)  $2984\text{ cm}^{-1}$ ,  $1747\text{ cm}^{-1}$ ,  $1513\text{ cm}^{-1}$ ,  $1025\text{ cm}^{-1}$ ; MS (relative intensity)  $m/z$  222 ( $\text{M}^+$ , 25), 135 (100); HRMS (EI)  $m/z$  calcd for  $\text{C}_{12}\text{H}_{14}\text{O}_4$  222.0892, found 222.0891.

### Ethyl 3-oxo-3-(*o*-tolyl)propanoate (3d)

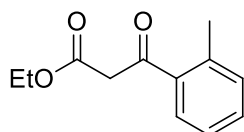

Light brown oil;  $^1\text{H}$ -NMR ( $\text{CDCl}_3$ , 400 MHz);  $\delta$  Keto Form 7.67-7.65 (m, 1H), 7.43-7.39 (m, 1H), 7.34-7.19 (m, 2H), 4.20 (q,  $J = 7.2$  Hz, 2H), 3.95 (s, 2H), 2.55 (s, 3H), 1.24 (t,  $J = 7.2$  Hz, 3H), Enol Form 12.48 (s, 1H), 7.43-7.39 (m, 1H), 7.34-7.19 (m, 3H), 4.27 (q,  $J = 6.8$  Hz, 2H), 2.47 (s, 3H), 1.34 (t,  $J = 6.8$  Hz, 3H);  $^{13}\text{C}$ -NMR ( $\text{CDCl}_3$ , 100 MHz)  $\delta$  Keto Form 195.65, 167.67, 139.44 136.22, 132.31, 132.30, 129.23, 125.86, 61.41, 48.31, 21.60, 14.11, Enol Form 174.98, 172.93, 136.60, 134.57, 131.07, 130.09, 128.47, 125.80, 91.70, 60.35, 20.59, 14.34; IR (neat)  $2981\text{ cm}^{-1}$ ,  $2932\text{ cm}^{-1}$ ,  $1746\text{ cm}^{-1}$ ,  $1693\text{ cm}^{-1}$ ,  $1318\text{ cm}^{-1}$ , MS (relative intensity)  $m/z$  206 ( $\text{M}^+$ , 40), 119 (100), 91 (34); HRMS (EI)  $m/z$  calcd for  $\text{C}_{12}\text{H}_{14}\text{O}_3$  206.0943, found 206.0952.

### Ethyl 3-(3,5-dimethylphenyl)-3-oxopropanoate (3e)

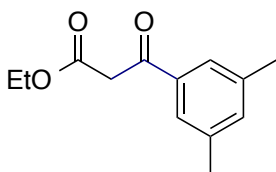

Color less oil;  $^1\text{H}$ -NMR ( $\text{CDCl}_3$ , 400 MHz);  $\delta$  Keto Form 7.54 (s, 2H), 7.22 (s, 1H), 4.21 (q,  $J = 6.8$  Hz, 2H), 3.96 (s, 2H), 2.37 (s, 6H), 1.26 (t,  $J = 6.8$  Hz, 3H), Enol Form 12.54 (s, 1H), 7.39 (s, 2H), 7.09 (m, 1H), 5.64 (s, 1H), 4.26 (q,  $J = 7.2$  Hz, 2H), 2.34 (s, 6H), 1.33 (t,  $J = 7.2$  Hz, 3H);  $^{13}\text{C}$ -NMR ( $\text{CDCl}_3$ , 100 MHz)  $\delta$  Keto Form 193.05, 167.82, 138.58, 136.26, 135.55, 126.41, 61.53, 46.18, 21.35, 14.21, Enol Form 173.39, 172.03, 138.24, 133.49, 133.09, 87.33, 60.37, 21.42, 14.44; IR (neat)  $2982\text{ cm}^{-1}$ ,  $2921\text{ cm}^{-1}$ ,  $1742\text{ cm}^{-1}$ ,  $1685\text{ cm}^{-1}$ ,  $1605\text{ cm}^{-1}$ ,  $1329\text{ cm}^{-1}$ ,  $1146\text{ cm}^{-1}$ ,  $1035\text{ cm}^{-1}$ ; MS (relative intensity)  $m/z$  220 ( $\text{M}^+$ , 50), 175 (10), 133 (100), 105 (49); HRMS (EI)  $m/z$  calcd for  $\text{C}_{13}\text{H}_{16}\text{O}_3$  220.1099, found 220.1089.

### Ethyl 3-(4-fluorophenyl)-3-oxopropanoate (3f)

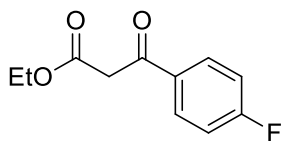

Light brown oil;  $^1\text{H-NMR}$  ( $\text{CDCl}_3$ , 400 MHz)  $\delta$  Keto Form 8.00-7.96 (m, 2H), 7.18-7.14 (m, 2H), 4.21 (q,  $J = 6.8$  Hz, 2 H), 3.97 (s, 2H), 1.26 (t,  $J = 6.8$  Hz, 3H), Enol Form 12.61 (s, 1H) 7.79-7.76 (m, 2H), 7.14-7.09 (m, 2H), 5.59 (s, 1H), 4.27 (q,  $J = 7.2$  Hz, 2H), 1.34 (t,  $J = 7.2$  Hz);  $^{13}\text{C-NMR}$  ( $\text{CDCl}_3$ , 100 MHz)  $\delta$  Keto Form 191.06, 167.45, 164.93, 132.59, 131.36 ( $J_{\text{C-F}} = 35.2$  Hz), 116.08 ( $J_{\text{C-F}} = 80.7$  Hz), 61.70, 46.08, 14.17 Enol Form 173.26, 170.47, 167.49, 131.33, 128.34 ( $J_{\text{C-F}} = 31.6$  Hz), 115.77 ( $J_{\text{C-F}} = 80.4$  Hz), 87.27, 60.52, 14.40;  $^{19}\text{F-NMR}$  ( $\text{CDCl}_3$ , 376 MHz)  $\delta$  Keto Form -108.38, Enol Form -103.72; IR (neat) 2984  $\text{cm}^{-1}$ , 1747  $\text{cm}^{-1}$ , 848  $\text{cm}^{-1}$ , MS (relative intensity)  $m/z$  210 ( $\text{M}^+$ , 52), 123 (100), 95 (29); HRMS (EI)  $m/z$  calcd for  $\text{C}_{11}\text{H}_{11}\text{FO}_3$  210.0692, found 210.0686.

### Ethyl 3-(4-chlorophenyl)-3-oxopropanoate (3g)

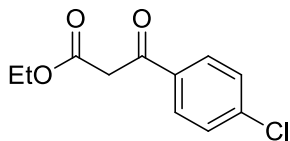

Light brown oil;  $^1\text{H-NMR}$  ( $\text{CDCl}_3$ , 400 MHz)  $\delta$  Keto Form 7.90-7.88 (m, 2H), 7.47-7.45 (m, 2H), 4.21 (q,  $J = 7.2$  Hz, 2H), 3.96 (s, 2H), 1.26 (t,  $J = 7.2$  Hz, 3H), Enol Form 12.58 (s, 1H), 7.72-7.70 (m, 2H), 7.41-7.38 (m, 2H), 5.64 (s, 1H), 4.27 (q,  $J = 7.2$  Hz, 2H), 1.34 (t,  $J = 7.2$  Hz, 3H);  $^{13}\text{C-NMR}$  ( $\text{CDCl}_3$ , 100 MHz)  $\delta$  Keto Form 191.47, 167.36, 140.46, 134.47, 130.08, 129.28, 61.77, 46.10, 14.21, Enol Form 173.21, 170.29, 137.46, 132.06, 128.98, 127.50, 87.81, 60.63, 14.43; IR (neat) 2981  $\text{cm}^{-1}$ , 1755  $\text{cm}^{-1}$ , 1741  $\text{cm}^{-1}$ , 703  $\text{cm}^{-1}$ ; MS (relative intensity)  $m/z$  228 ( $\text{M}^+$ , 7), 226 ( $\text{M}^+$ , 24), 139 (100), 111 (17); HRMS (EI)  $m/z$  calcd for  $\text{C}_{11}\text{H}_{11}\text{ClO}_3$  226.0397, found 226.0393.

### Ethyl 3-(2-bromophenyl)-3-oxopropanoate (3h)

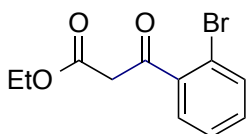

Light brown oil;  $^1\text{H-NMR}$  ( $\text{CDCl}_3$ , 400 MHz)  $\delta$  Keto Form 7.62-7.58 (m, 1H), 7.60-7.46 (m, 1H), 7.40-7.23 (m, 2H), 4.17 (q,  $J = 7.2$  Hz, 2H), 4.01 (s, 2H), 1.23 (t,  $J = 7.2$  Hz, 3H), Enol

Form 12.42 (s, 1H), 7.62-7.58 (m, 1H), 7.60-7.46 (m, 1H), 7.40-7.23 (m, 2H), 5.44 (s, 1H), 4.26 (q,  $J=7.2$  Hz, 2H), 1.32 (t,  $J=7.2$  Hz, 3H);  $^{13}\text{C}$ -NMR ( $\text{CDCl}_3$ , 100 MHz)  $\delta$  Keto Form 185.71, 166.87, 134.01, 132.45, 131.26, 130.32, 129.62, 127.61, 61.61, 48.89, 14.12, Enol Form 172.65, 172.00, 140.05, 135.85, 133.85, 127.45, 121.02, 119.29, 93.29, 60.65, 14.34; IR (neat)  $2982\text{ cm}^{-1}$ ,  $2938\text{ cm}^{-1}$ ,  $1744\text{ cm}^{-1}$ ,  $1703\text{ cm}^{-1}$ ,  $1633\text{ cm}^{-1}$ ,  $1587\text{ cm}^{-1}$ ,  $1246\text{ cm}^{-1}$ ,  $1198\text{ cm}^{-1}$ ,  $1027\text{ cm}^{-1}$ ,  $761\text{ cm}^{-1}$ ; MS (relative intensity)  $m/z$  272 ( $\text{M}^+$ , 2), 270 ( $\text{M}^+$ , 2), 227 (5), 225 (5), 191 (97), 185 (98), 183 (100), 157 (18), 155 (18); HRMS (EI)  $m/z$  calcd for  $\text{C}_{11}\text{H}_{11}\text{BrO}_3$  269.9892, found 269.9836.

### Ethyl 3-(naphthalen-2-yl)-3-oxopropanoate (3i)

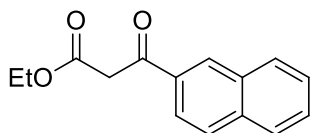

Light brown oil;  $^1\text{H}$ -NMR ( $\text{CDCl}_3$ , 400 MHz)  $\delta$  Keto Form 8.46 (s, 1H), 8.03-7.97 (m, 2H), 7.93-7.84 (m, 2H), 7.66-7.54 (m, 2H), 4.26-4.21 (m, 2H), 4.13 (s, 2H), 1.27 (t, 6.4 Hz, 3H), Enol Form 12.68 (s, 1H), 8.03-7.97 (m, 2H), 7.93-7.84 (m, 2H), 7.66-7.54 (m, 2H), 5.82 (s, 1H), 4.33-4.27 (m, 2H), 1.36 (t, 7.2 Hz, 3H);  $^{13}\text{C}$ -NMR ( $\text{CDCl}_3$ , 100 MHz)  $\delta$  Keto Form 192.56, 167.72, 135.91, 133.46, 132.50, 129.78, 128.98, 128.81, 127.91, 127.07, 126.79, 123.90, 61.63, 46.18, 14.43, Enol Form 173.34, 171.32, 134.76, 132.91, 130.70, 129.14, 128.35, 127.77, 127.65, 126.75, 126.77, 122.64, 87.95, 60.49, 14.43; IR (neat)  $2980\text{ cm}^{-1}$ ,  $1747\text{ cm}^{-1}$ ,  $1731\text{ cm}^{-1}$ ,  $1031\text{ cm}^{-1}$ ; MS (relative intensity)  $m/z$  242 ( $\text{M}^+$ , 45), 155 (100), 127 (36); HRMS (EI)  $m/z$  calcd for  $\text{C}_{15}\text{H}_{14}\text{O}_3$  242.0943, found 242.0945.

### Ethyl 3-(3-methoxyphenyl)-3-oxopropanoate (3j)

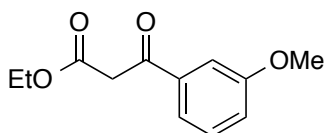

This compound was known. See: Baburajan, P.; Elango, K. P. *Tetrahedron Lett.* **2014**, *55*, 3525.

Colorless oil;  $^1\text{H}$ -NMR ( $\text{CDCl}_3$ , 400 MHz)  $\delta$  Keto Form 7.50-7.47 (m, 2H), 7.39-7.30 (m, 1H), 7.14-7.12 (m, 1H), 4.21 (q,  $J=7.2$  Hz, 2H), 3.97 (s, 2H), 3.84 (s, 3H), 1.26 (t,  $J=7.2$  Hz, 3H), Enol Form 12.57 (s, 1H), 7.39-7.30 (m, 3H), 7.01-6.98 (m, 1H), 5.65 (s, 1H), 4.26 (q,  $J=7.2$  Hz, 2H), 3.83 (s, 3H), 1.33 (t,  $J=7.2$  Hz, 3H);  $^{13}\text{C}$ -NMR ( $\text{CDCl}_3$ , 100 MHz)  $\delta$

Keto Form 192.49, 167.61, 160.03, 137.44, 129.86, 121.30, 120.47, 112.59, 61.60, 55.57, 46.22, 14.41, Enol Form 173.28, 171.36, 159.81, 134.97, 129.66, 118.55, 117.37, 111.21, 87.74, 60.47, 55.46, 14.19.

### Benzyl 3-oxo-3-phenylpropanoate (3k)

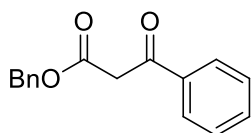

Light brown oil;  $^1\text{H-NMR}$  ( $\text{CDCl}_3$ , 400 MHz)  $\delta$  Keto Form 7.94-7.92 (m, 2H), 7.62-7.58 (m, 1H), 7.49-7.31 (m, 7H) 5.20 (s, 2H), 4.05 (s, 2H), Enol Form 12.49 (s, 1H), 7.79-7.76 (m, 2H), 7.49-7.31 (m, 8H), 5.74 (s, 1H), 5.26 (s, 2H);  $^{13}\text{C-NMR}$  ( $\text{CDCl}_3$ , 100 MHz)  $\delta$  Keto Form 192.41, 167.45, 135.98, 135.41, 133.85, 131.44, 128.86, 128.63, 128.56, 128.42, 128.32, 126.16, 67.23, 46.00, Enol Form 172.98, 171.88, 135.86, 133.85, 133.35, 129.90, 128.86, 128.70, 128.63, 126.56, 128.41, 125.32, 87.27, 66.14; IR (neat)  $3064\text{ cm}^{-1}$ ,  $2951\text{ cm}^{-1}$ ,  $1747\text{ cm}^{-1}$ ,  $1454\text{ cm}^{-1}$ ; MS (relative intensity)  $m/z$  254 ( $\text{M}^+$ , 18), 120 (96), 105 (65), 91 (100), 77 (38); HRMS (EI)  $m/z$  calcd for  $\text{C}_{16}\text{H}_{14}\text{O}_3$  254.0943, found 254.0944.

### 3-Benzoyldihydrofuran-2(3H)-one (3l)

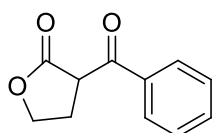

This compound was known. See: Jiang, X.; Fu, D.; Zhang, G.; Cao, Y.; Liu, L.; Song, J.; Wang, R. *Chem. Commun.* **2010**, *46*, 4294.

Colorless oil;  $^1\text{H-NMR}$  ( $\text{CDCl}_3$ , 400 MHz)  $\delta$  8.11-8.09 (m, 2H), 7.64-7.50 (m, 3H), 4.63-4.52 (m, 2H), 4.48-4.42 (m, 1H), 2.92-2.85 (m, 1H), 2.57-2.48 (m, 1H);  $^{13}\text{C-NMR}$  ( $\text{CDCl}_3$ , 100 MHz)  $\delta$  193.11, 172.99 135.76, 132.82, 129.65, 128.92, 128.10, 68.00, 48.15, 26.13.

### Ethyl 2-benzoylheptanoate (3m)

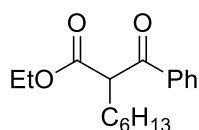



Colorless oil;  $^1\text{H-NMR}$  ( $\text{CDCl}_3$ , 400 MHz)  $\delta$  8.00-7.98 (m, 2H), 7.60-7.56 (m, 1H), 7.50-7.46 (m, 2H), 4.30-4.26 (m, 1H), 4.14 (q,  $J = 6.8$  Hz, 2H), 2.03-1.98 (m, 2H), 1.34-1.26 (m, 8H), 1.17 (t  $J = 6.8$  Hz, 3H), 0.86 (t,  $J = 7.2$  Hz, 3H);  $^{13}\text{C-NMR}$  ( $\text{CDCl}_3$ , 100 MHz)  $\delta$  195.48, 170.26, 136.47, 133.55, 128.85, 128.69, 61.44, 54.52, 31.66, 29.22, 29.13, 27.73, 22.67, 14.16; IR (neat)  $2928\text{ cm}^{-1}$ ,  $1736\text{ cm}^{-1}$ ,  $1639\text{ cm}^{-1}$ ,  $1160\text{ cm}^{-1}$ ; MS (relative intensity)  $m/z$  231 (M-OEt, 10), 192 (100), 105 (100), 77 (100); HRMS (EI)  $m/z$  calcd for  $\text{C}_{17}\text{H}_{24}\text{O}_3$  276.1725, found 276.1723.

### 1-Phenyl-2-(phenylsulfonyl)ethanone (3n)

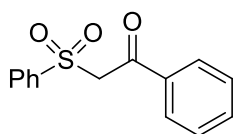

This compound was known. See: Xuan, J.; Feng, Z.-J.; Chen, J.-R.; Lu, L.-Q.; Xiao, W.-J. *Chem. – Eur. J.* **2014**, *20*, 3045.

White solid (m.p. = 89-92 °C, Lit; m.p. = 90-92 °C);  $^1\text{H-NMR}$  ( $\text{CDCl}_3$ , 400 MHz)  $\delta$  7.96-7.89 (m 4H), 7.69-7.61 (m, 2H), 7.56 (t,  $J = 7.6$  Hz, 2H), 7.49 (t,  $J = 7.6$  Hz, 2H), 4.74 (s, 2H);  $^{13}\text{C-NMR}$  ( $\text{CDCl}_3$ , 400 MHz)  $\delta$  188.11, 138.80, 135.80, 134.51, 134.38, 129.39, 129.33, 128.98, 128.69, 63.52.

### Ethyl 2-((2,2,6,6-tetramethylpiperidin-1-yl)oxy)acetate (4)

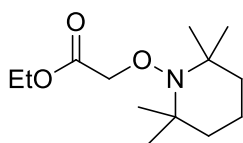

This compound was known, see; Sumino, S.; Fusano, A.; Ryu, I. *Org. Lett.* **2013**, *15*, 2826.

Yellow oil;  $^1\text{H-NMR}$  ( $\text{CDCl}_3$ , 400 MHz)  $\delta$  4.43 (s, 2H), 4.20 (q,  $J = 6.8$  Hz, 2H), 1.45-1.42 (m, 4H), 1.31-1.25 (m, 2H), 1.28 (t,  $J = 7.3$  Hz, 3H), 1.15 (s, 12 H);  $^{13}\text{C-NMR}$  ( $\text{CDCl}_3$ , 100 MHz)  $\delta$  169.96, 75.70, 60.59, 60.17, 39.82, 32.83, 20.19, 17.16, 14.32.

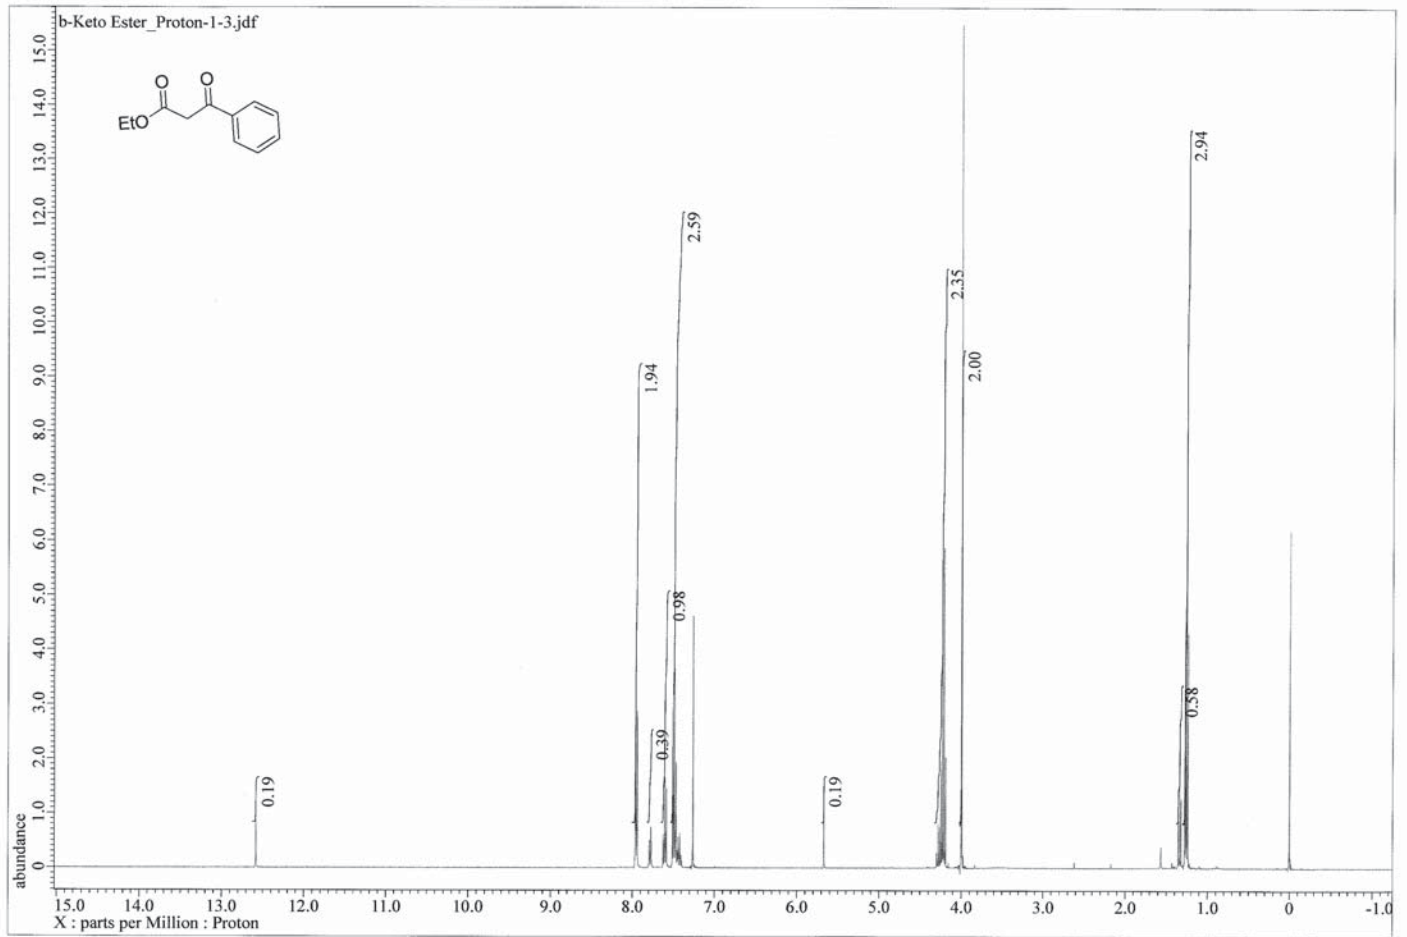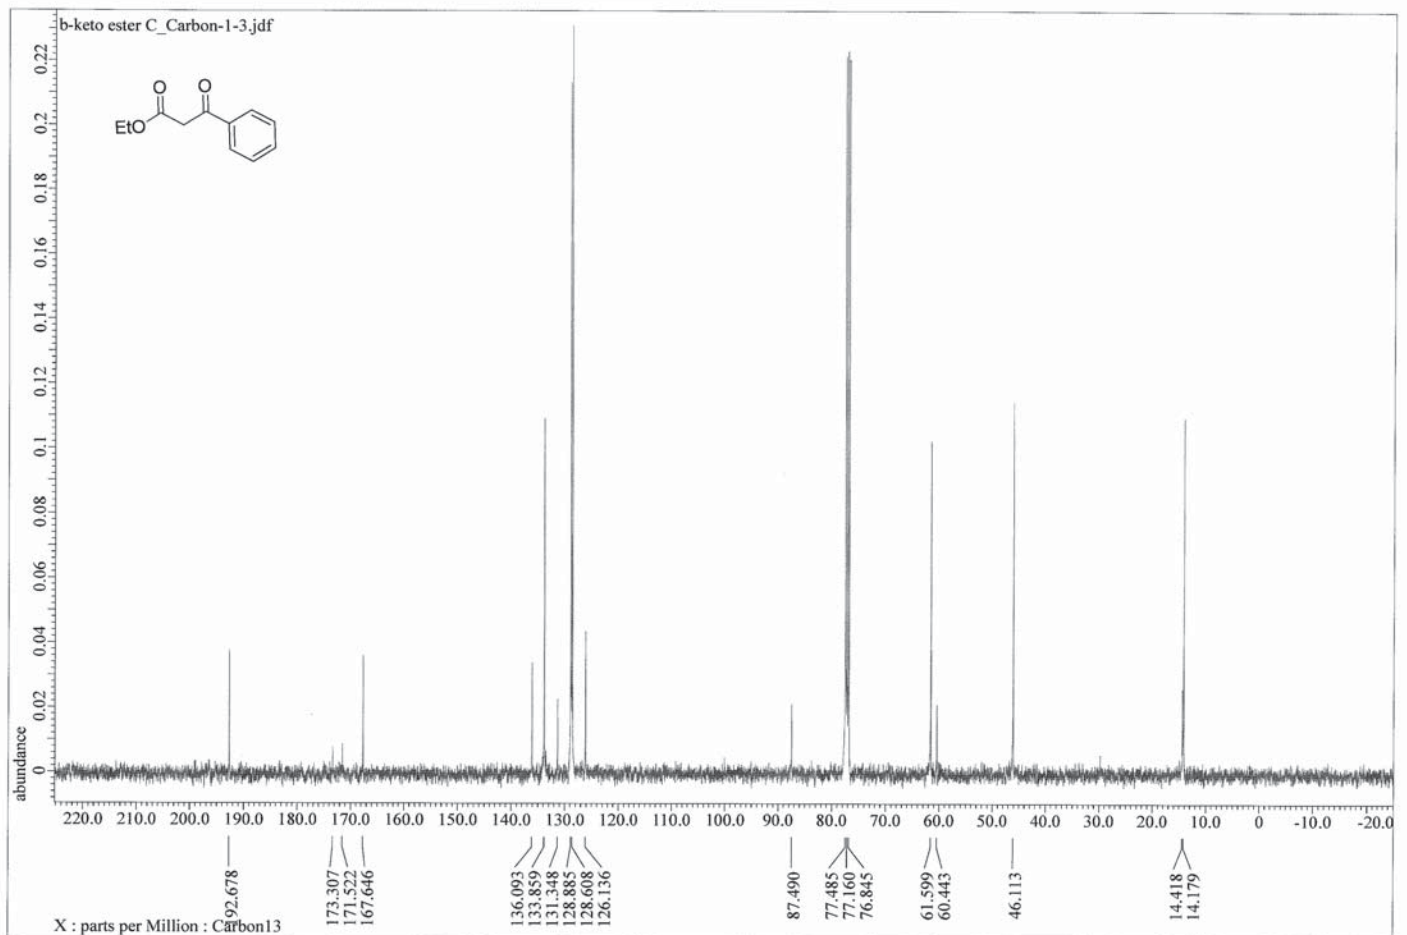

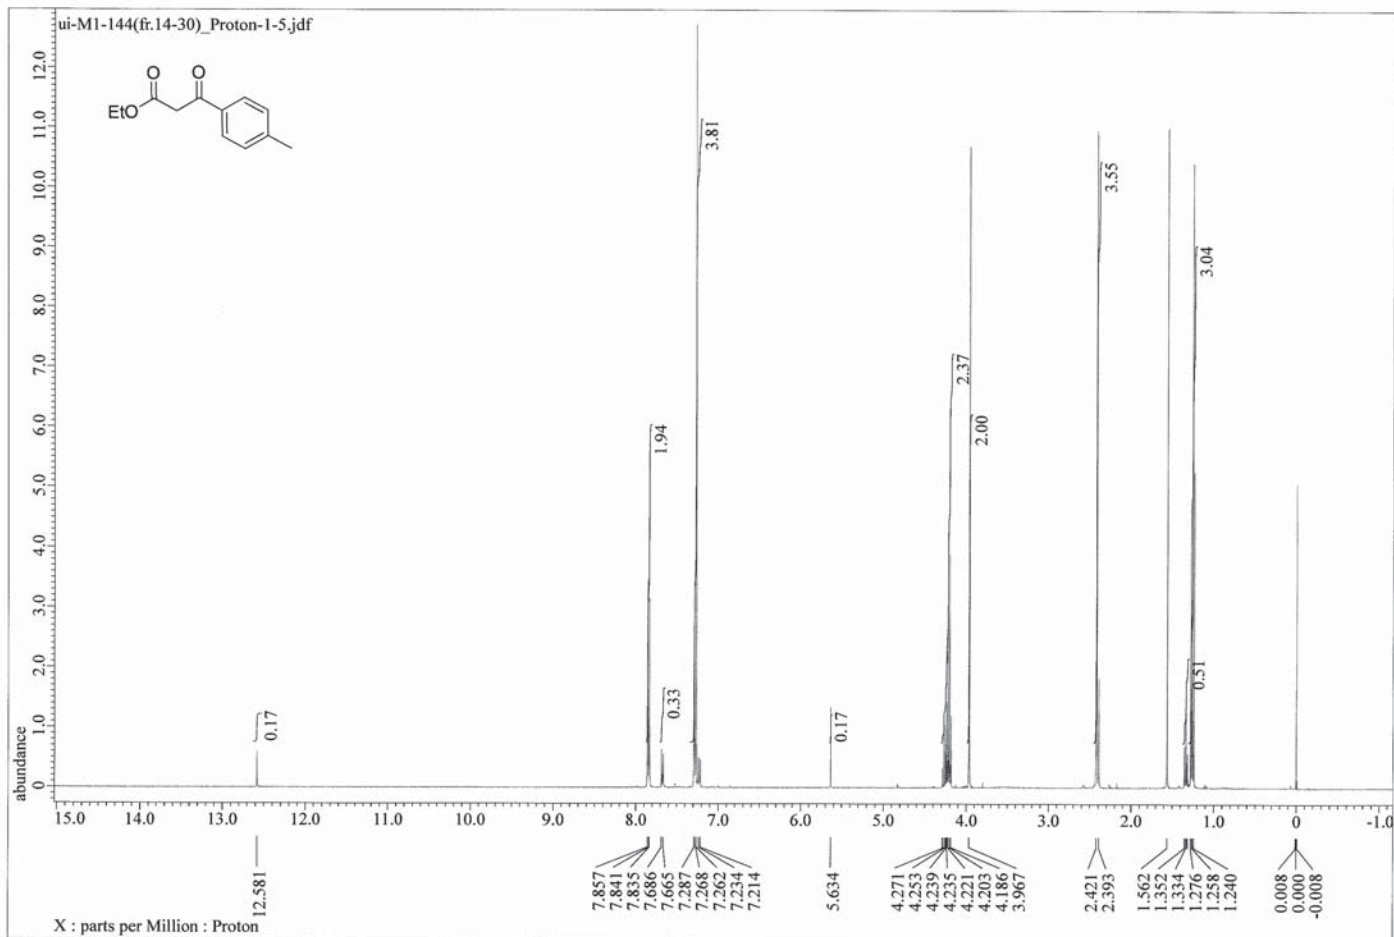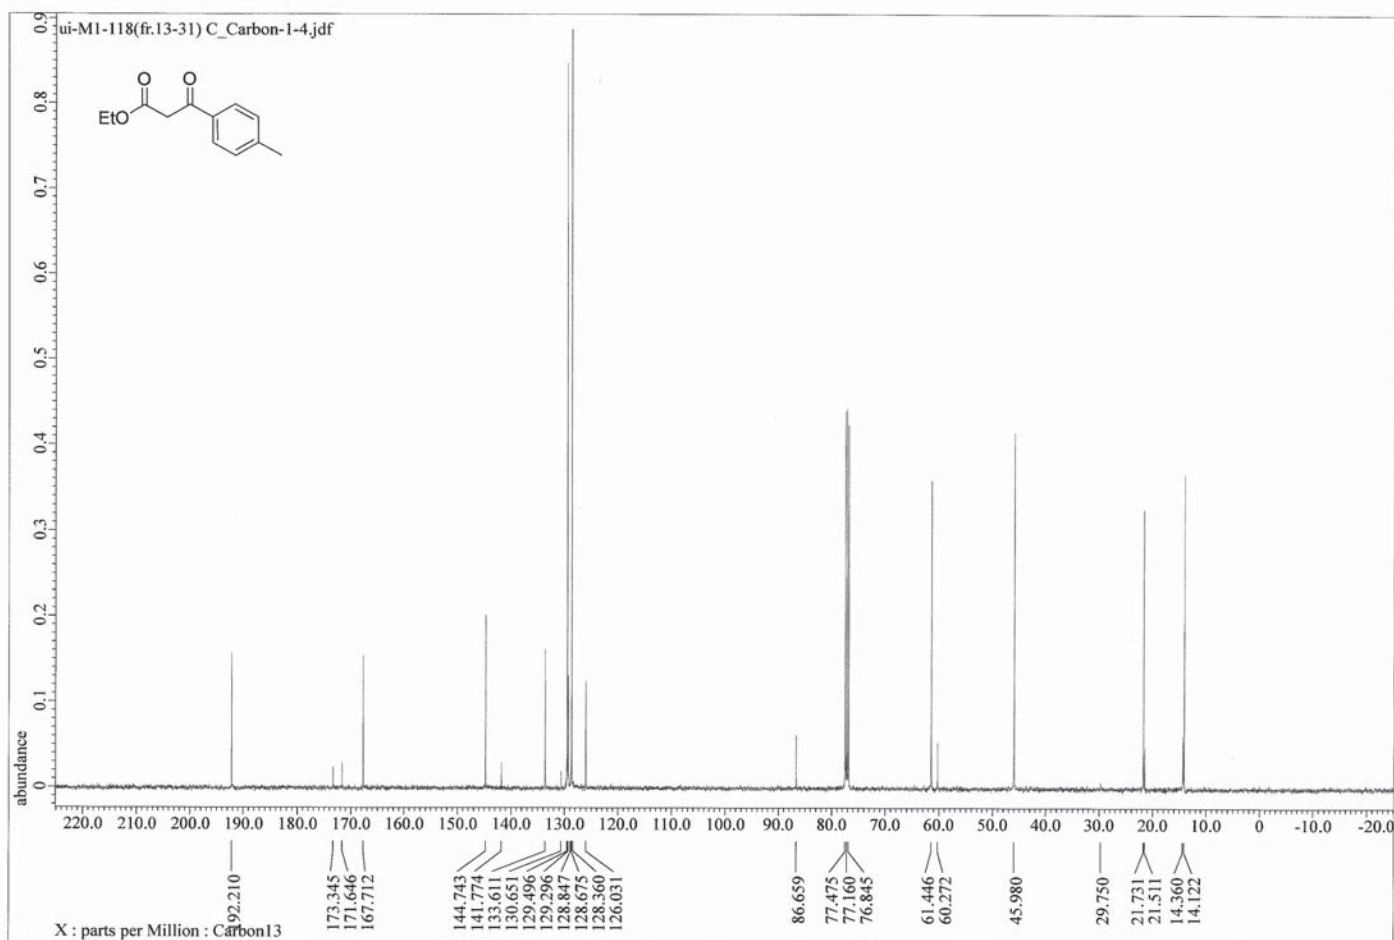

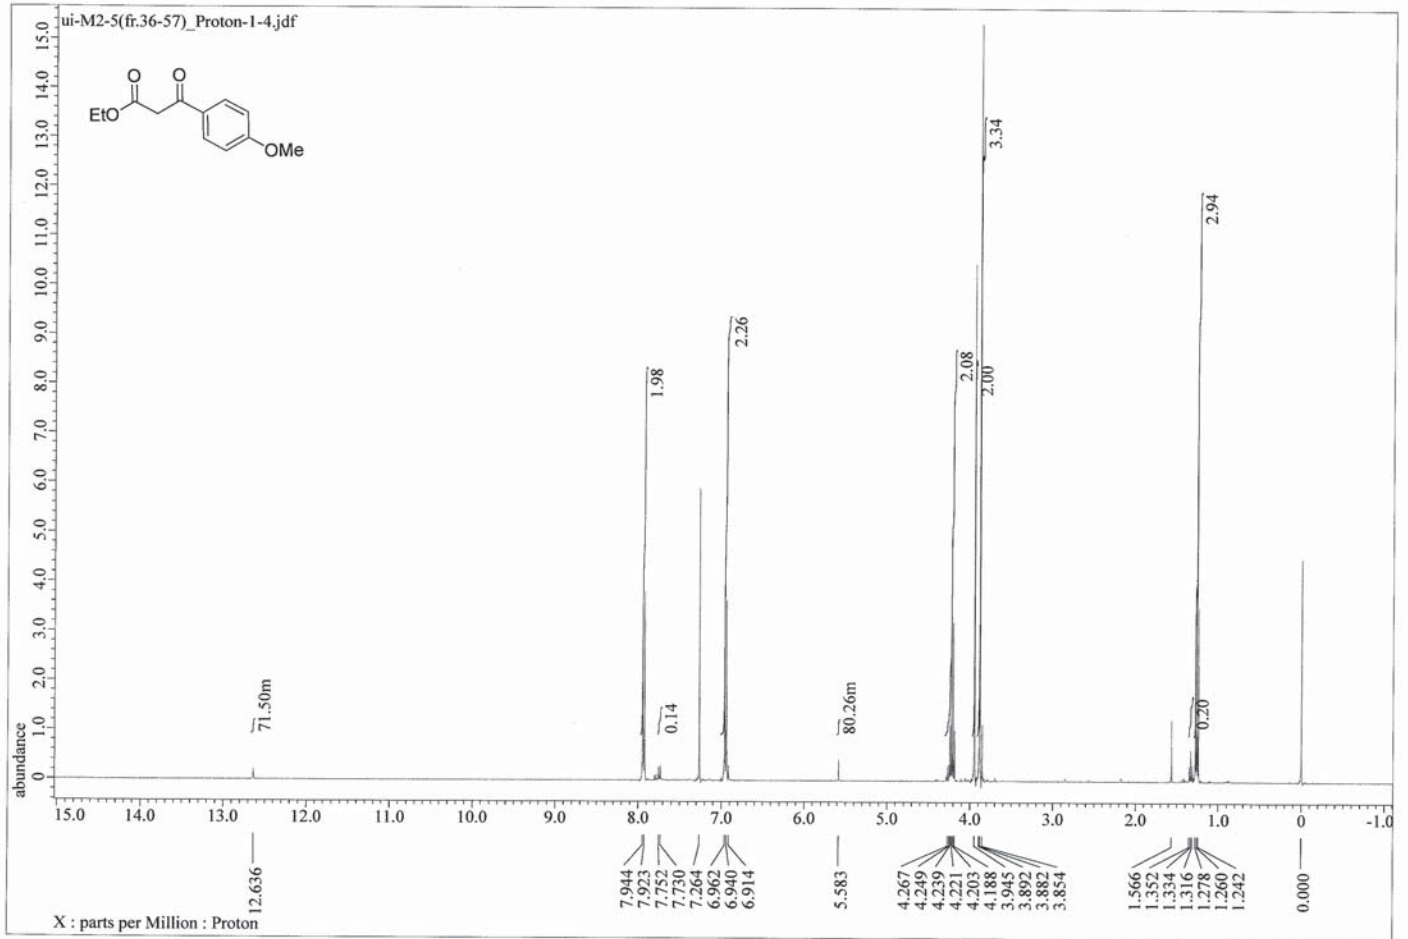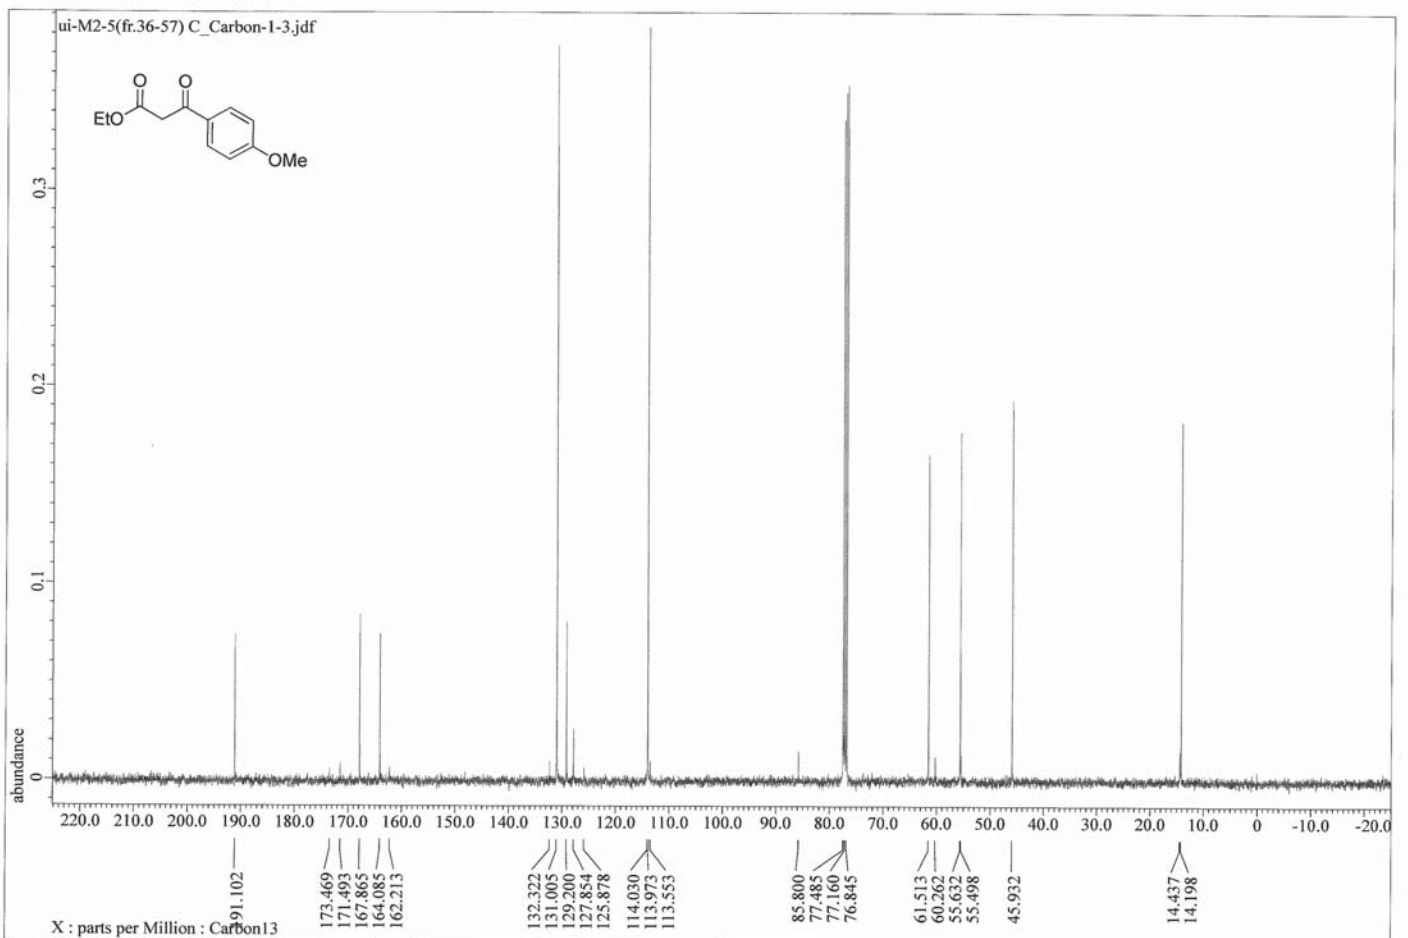

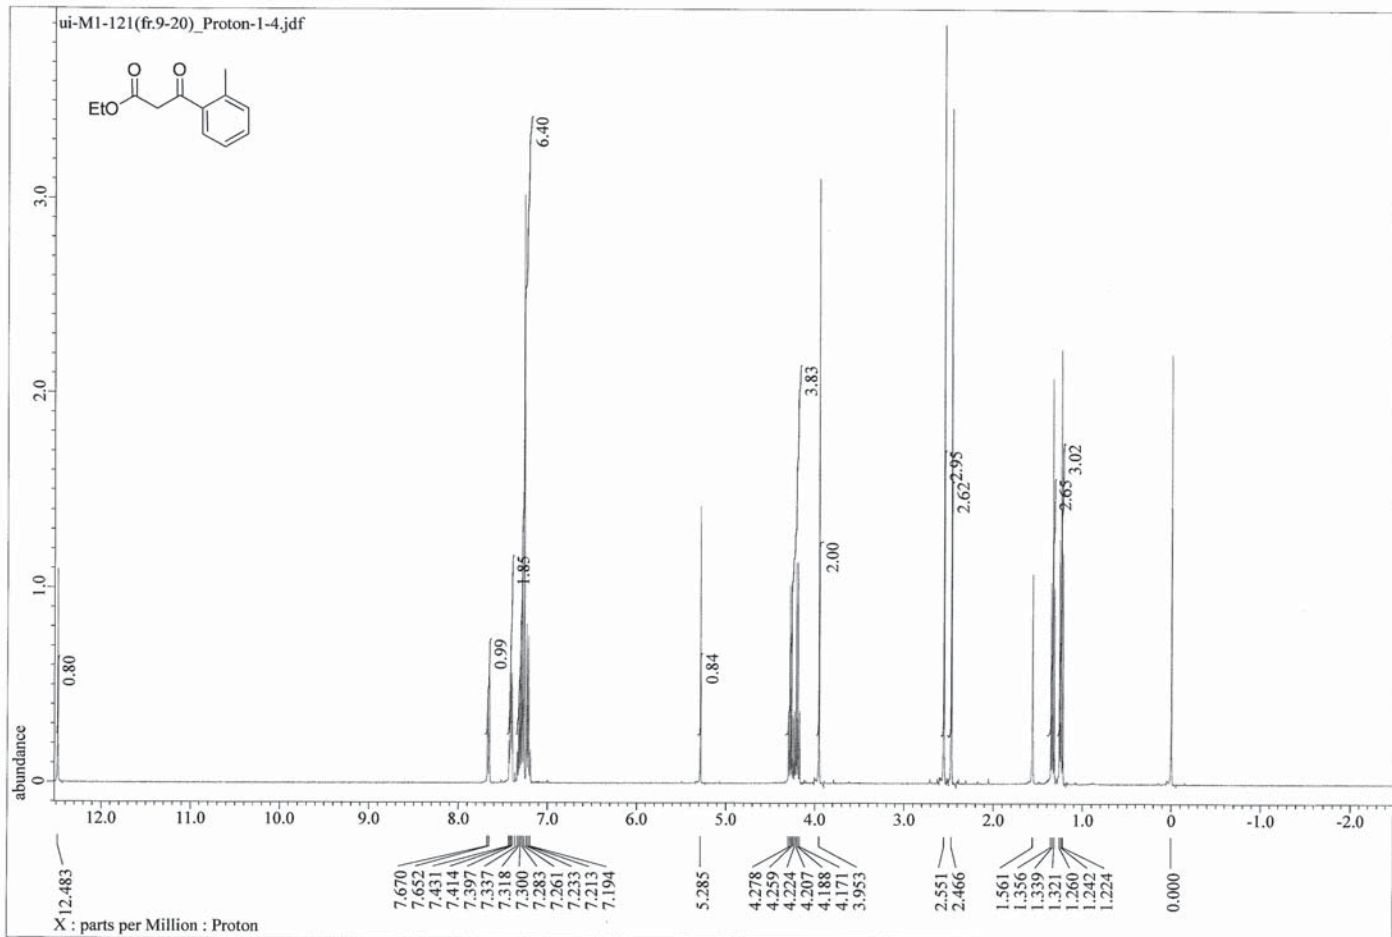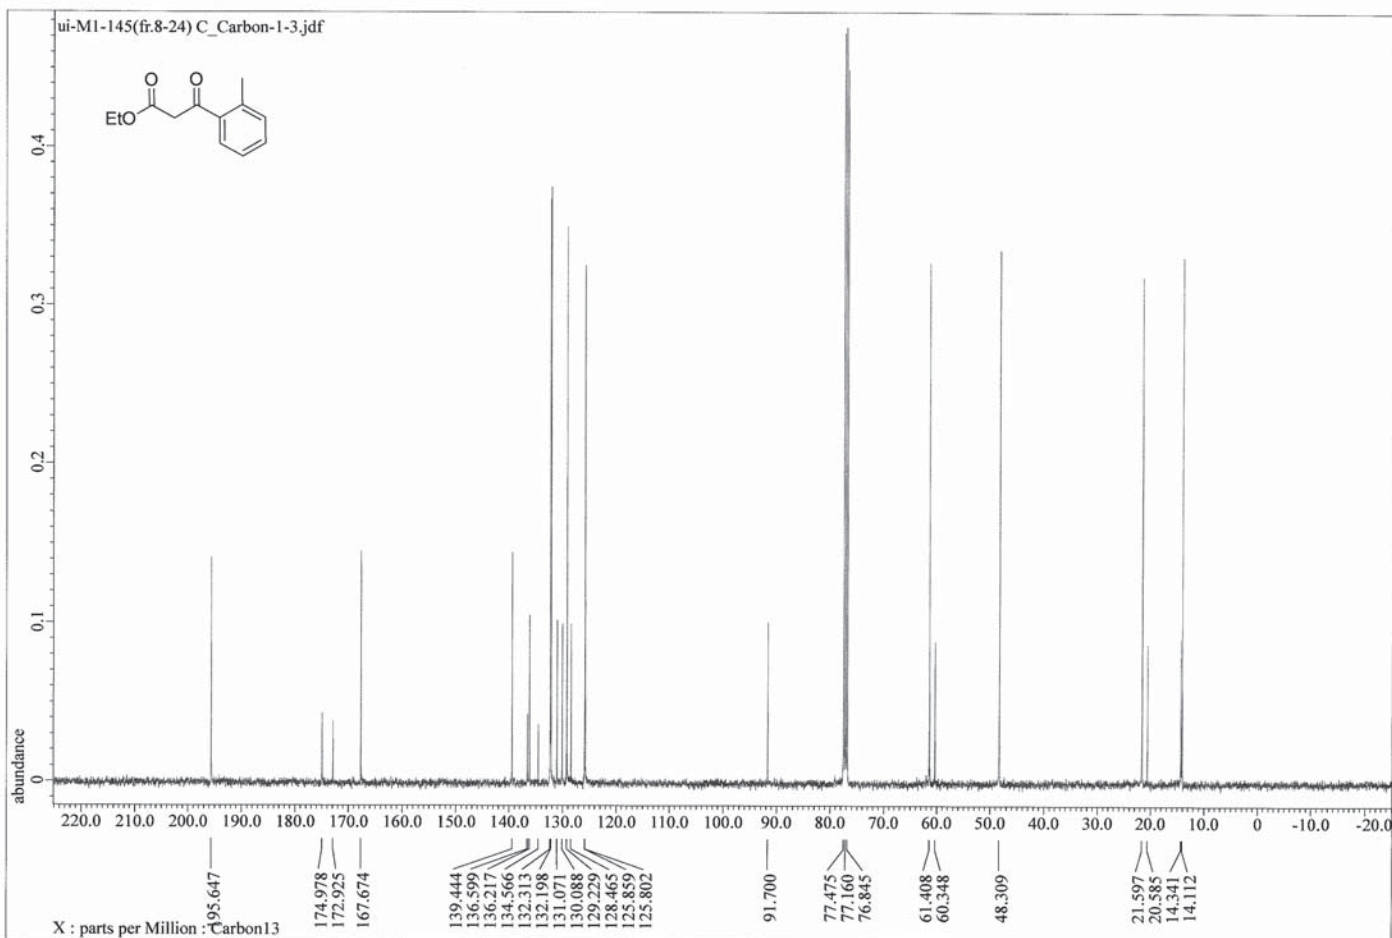

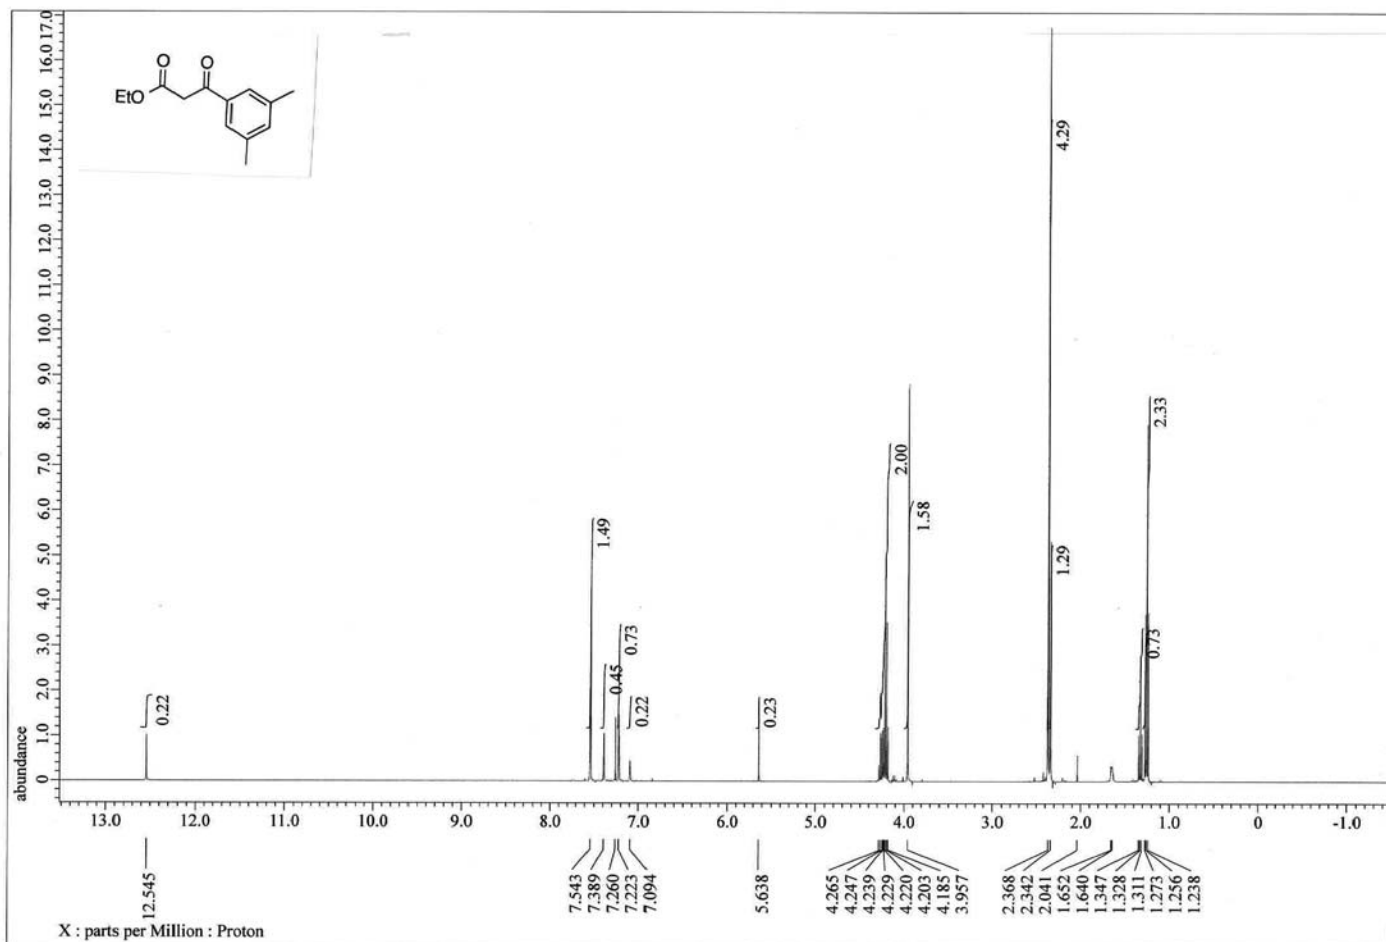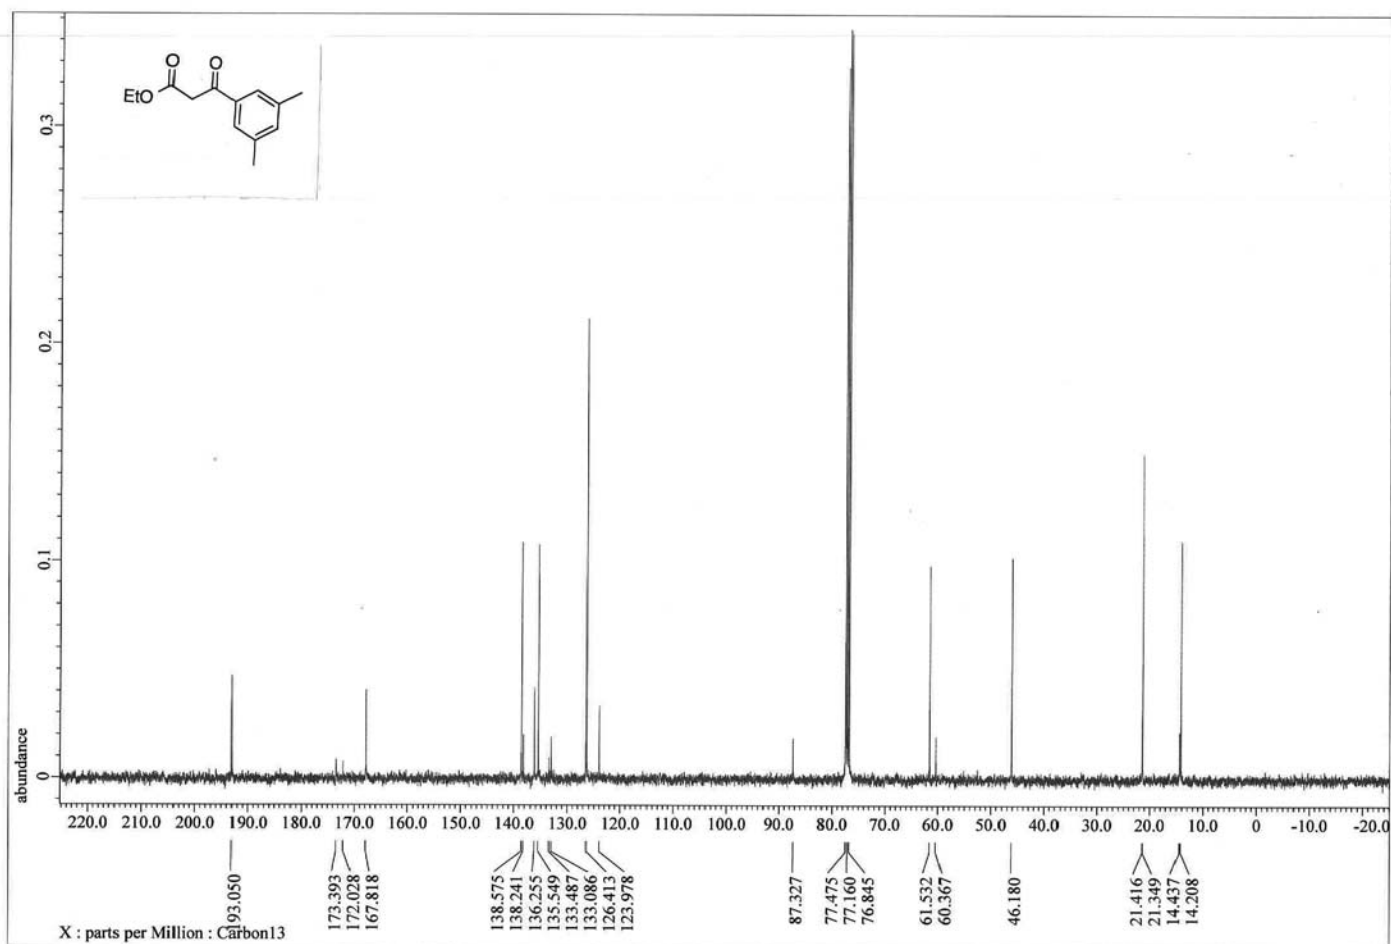

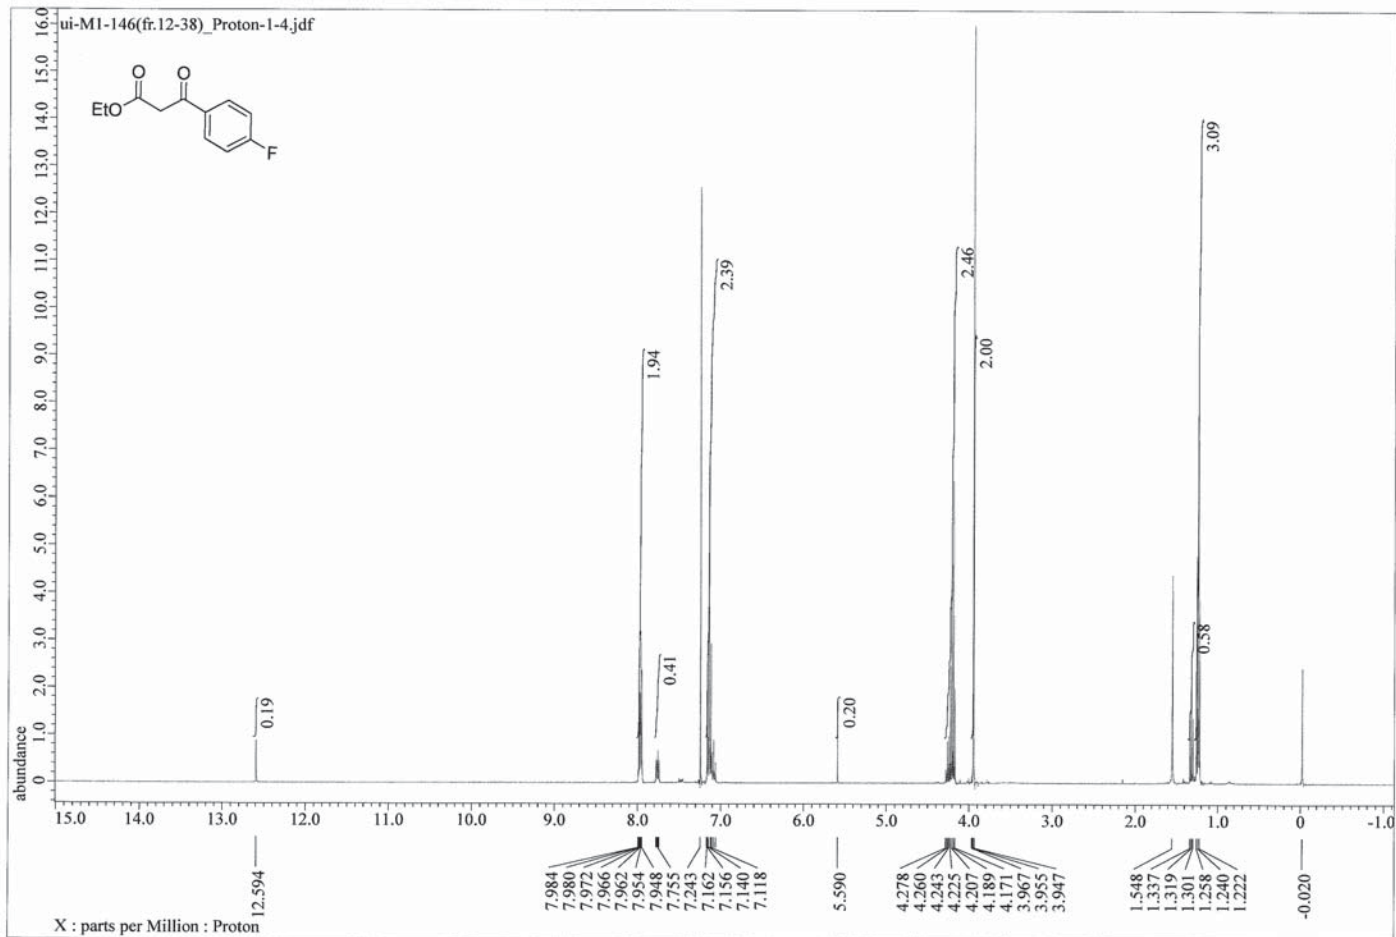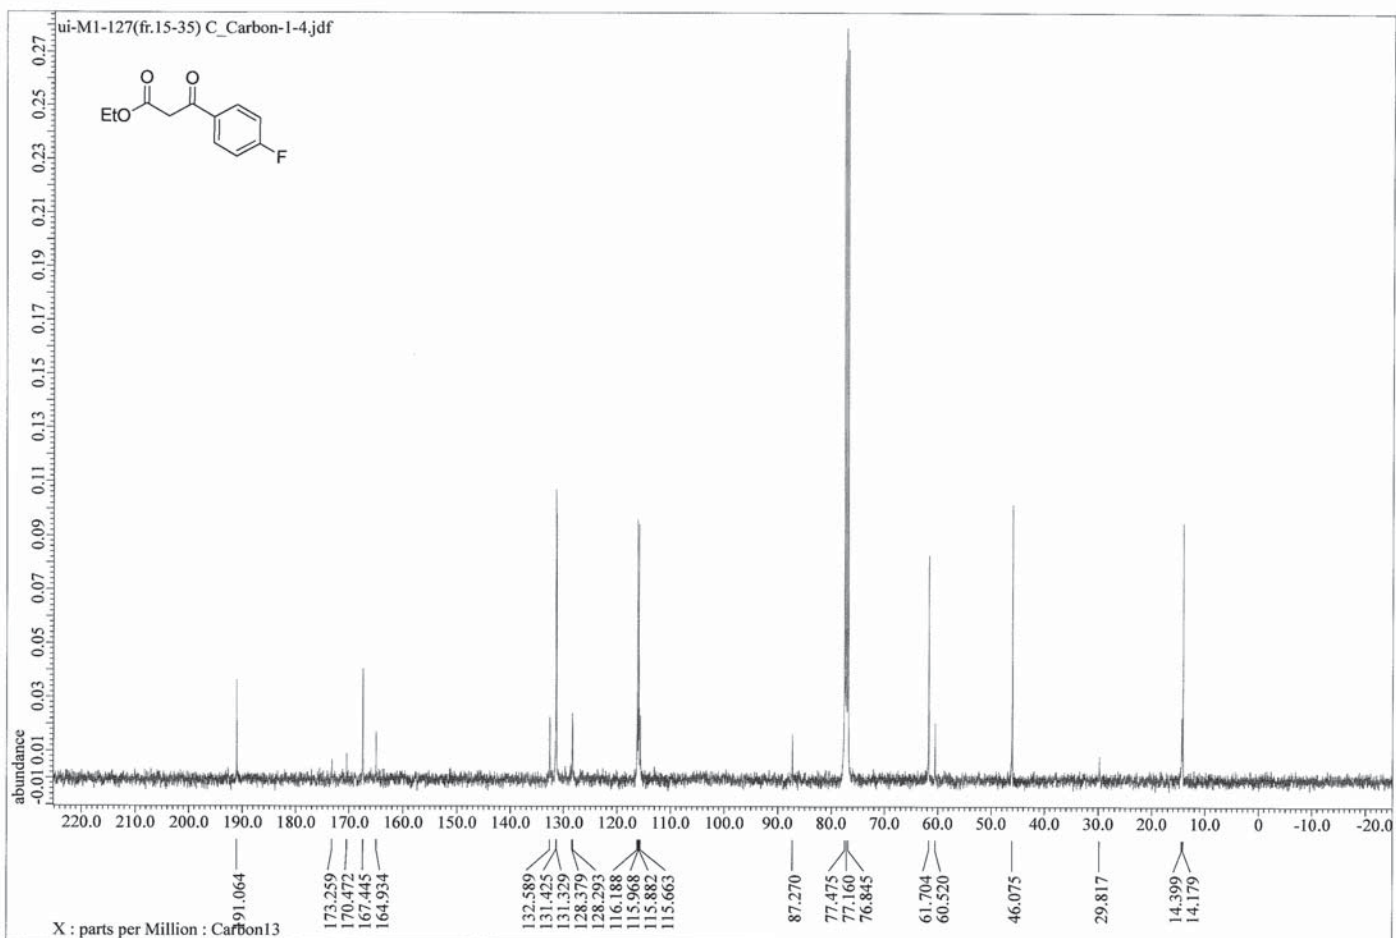



ui-M1-146 F\_Proton-1-3.jdf

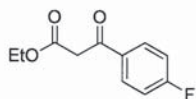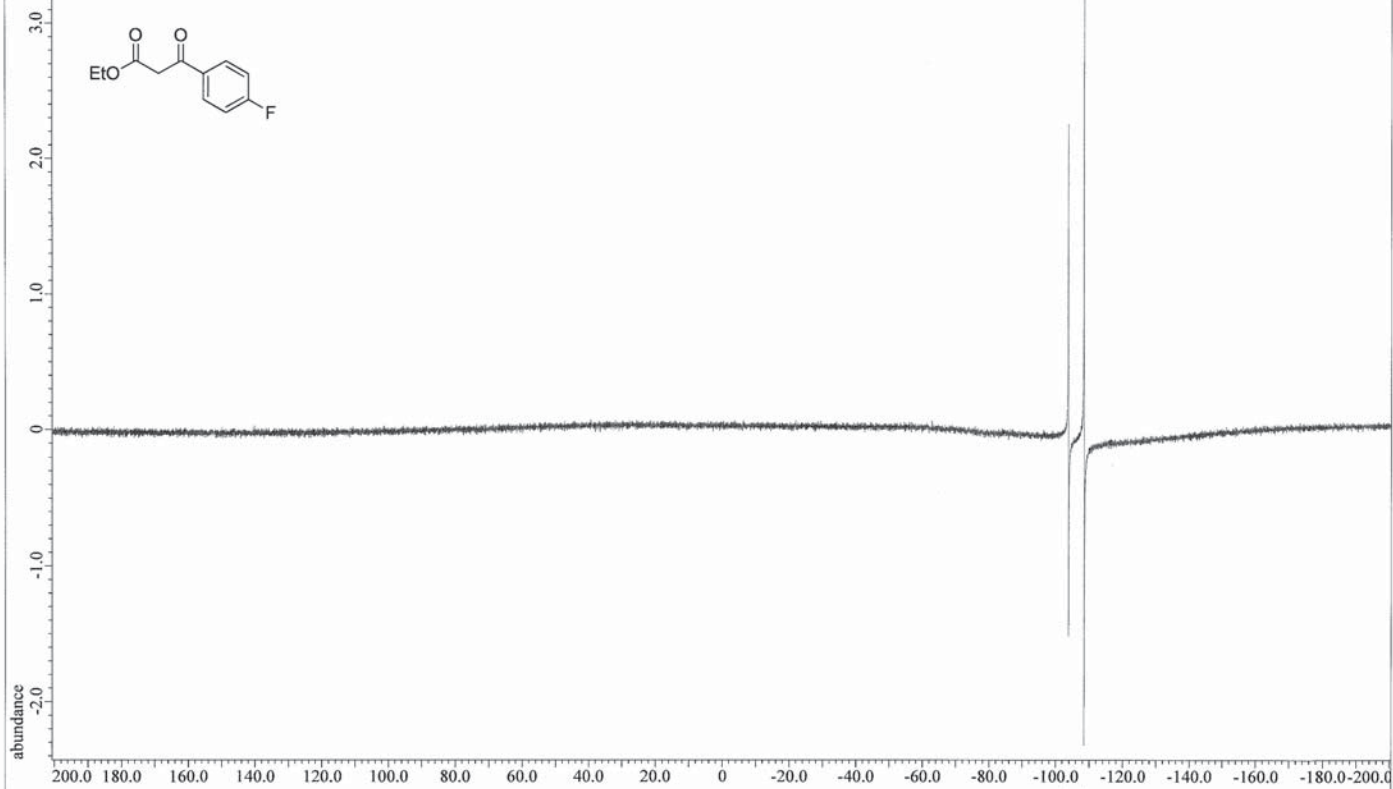

X : parts per Million : Fluorine19

-103.724  
-103.785  
-108.377  
-108.438



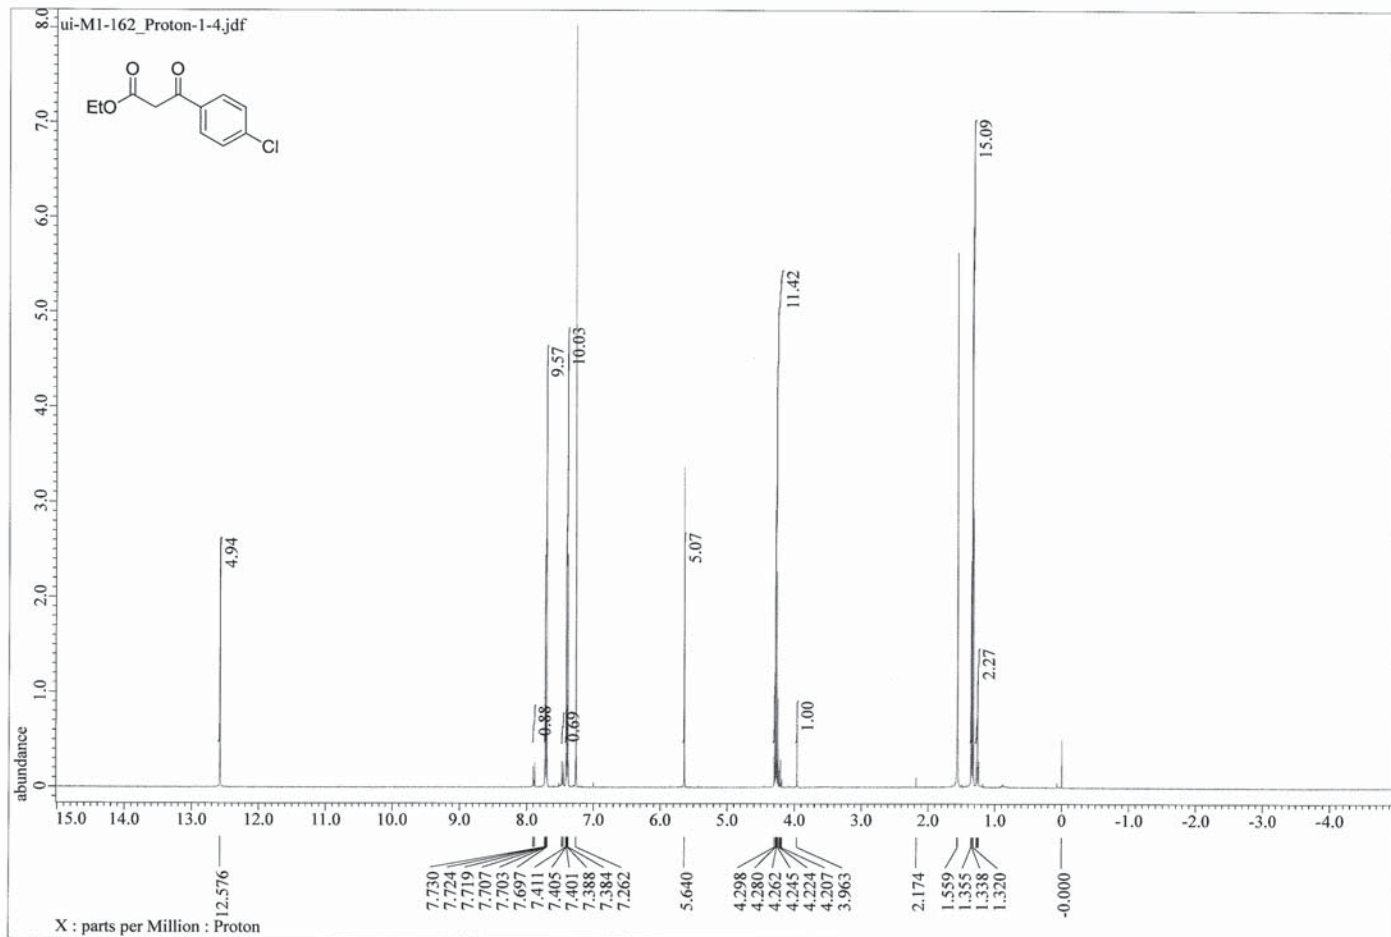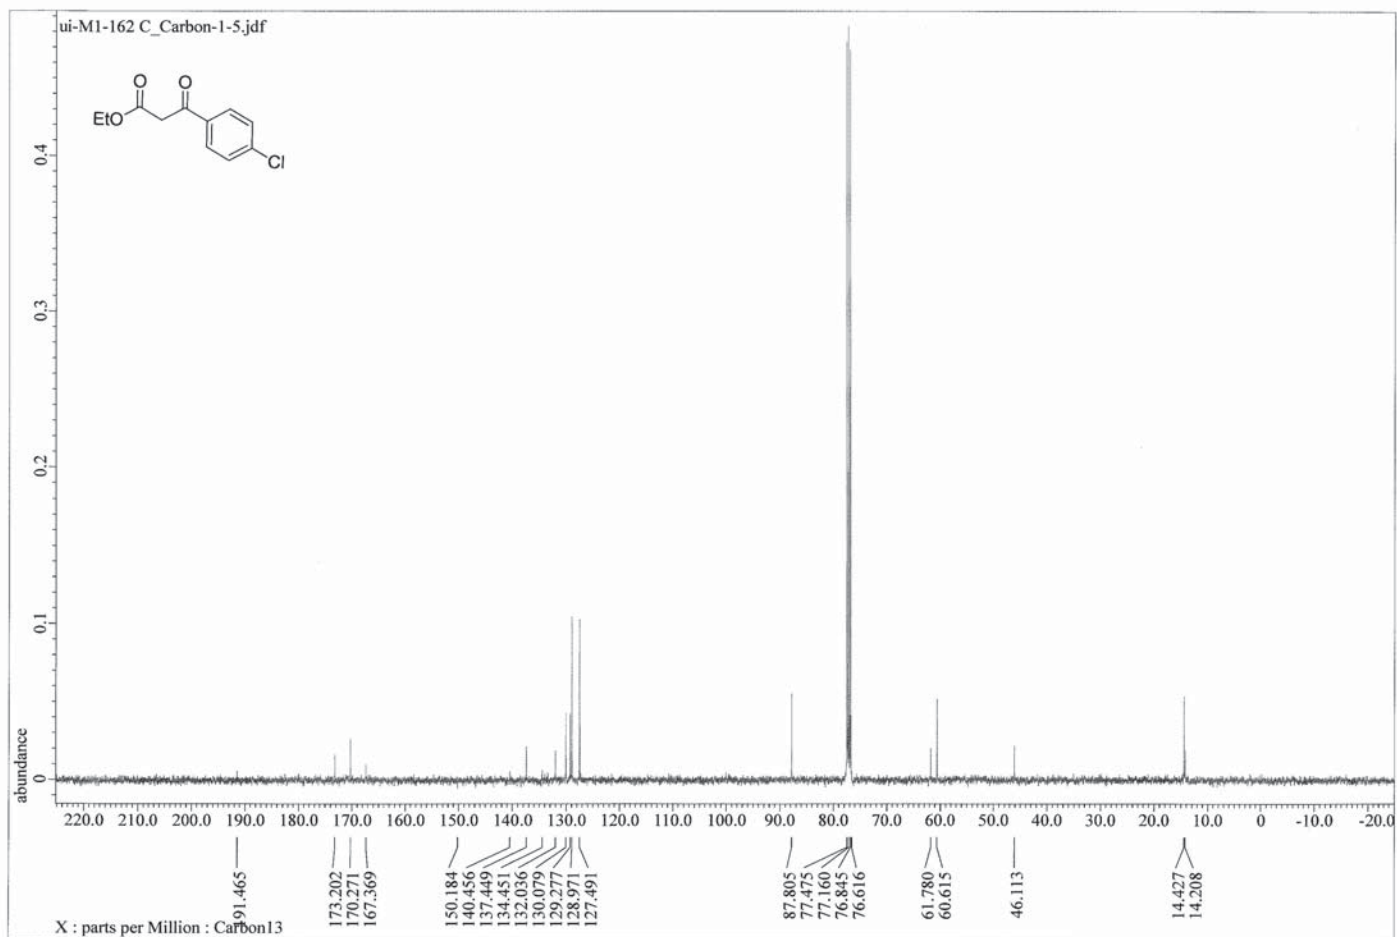

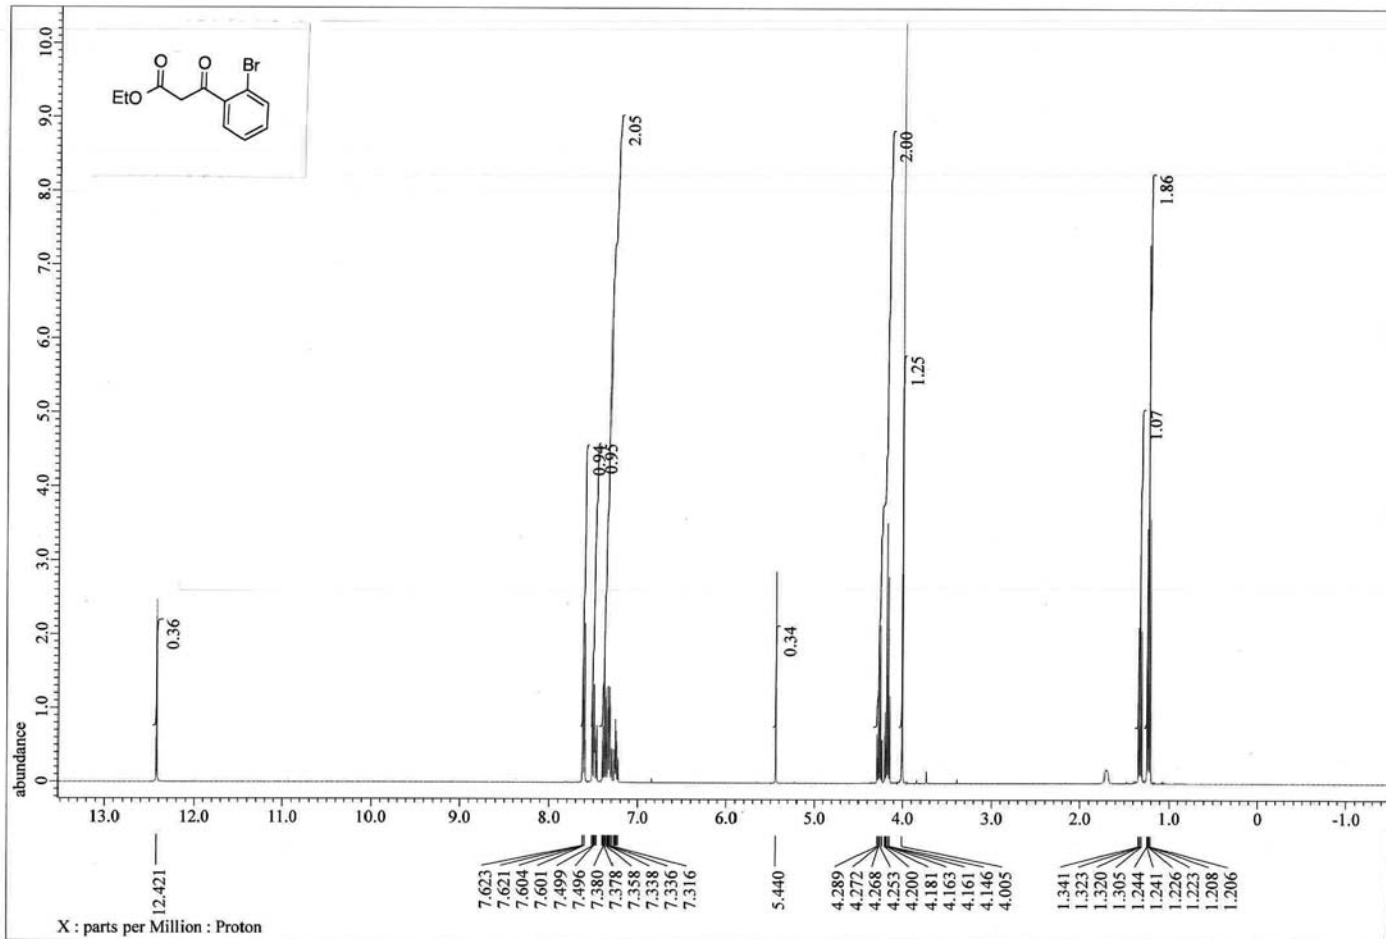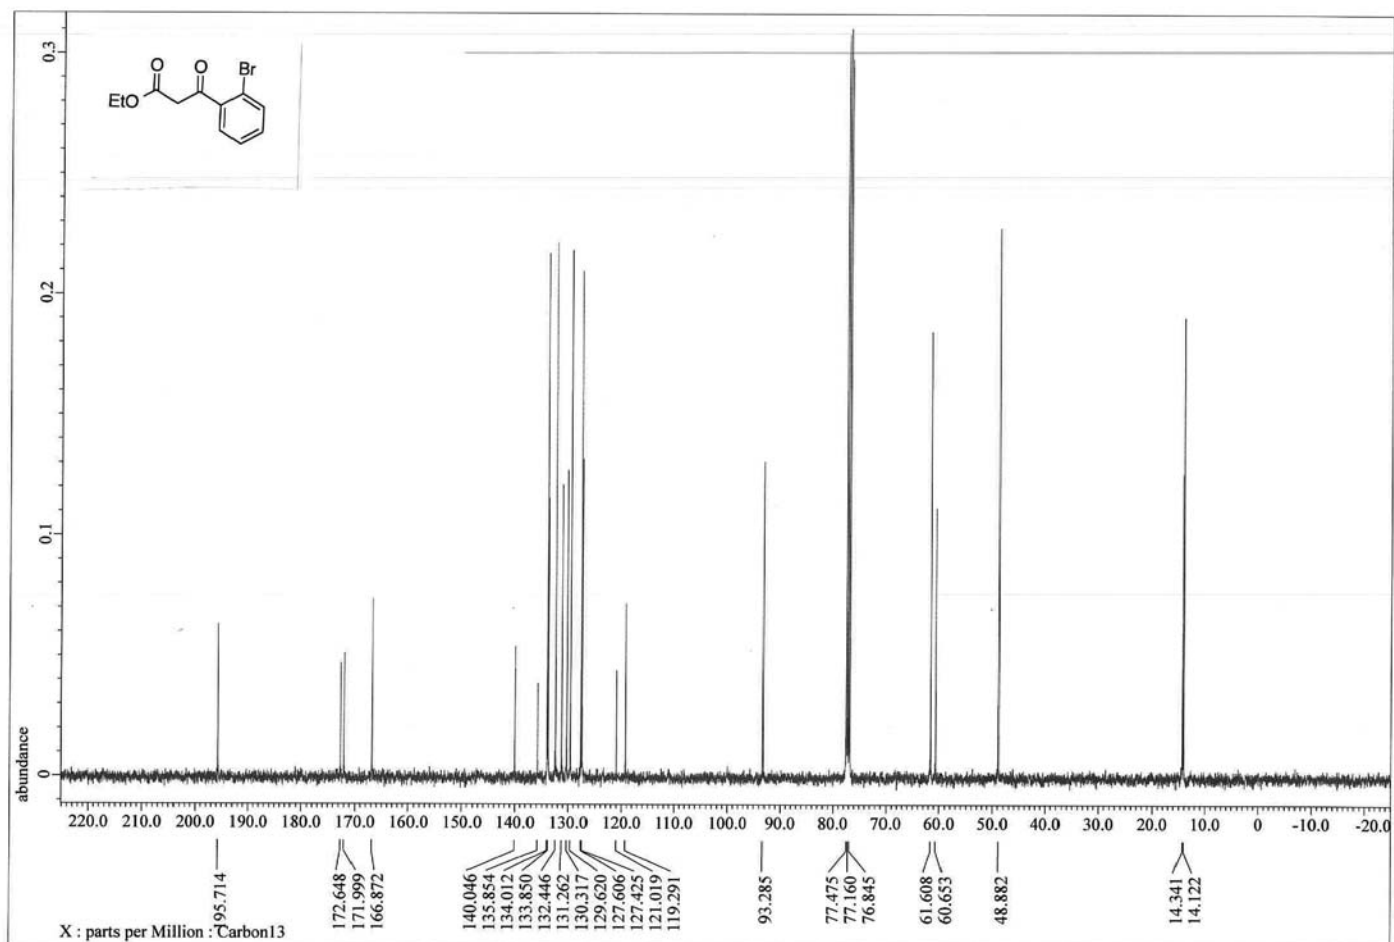

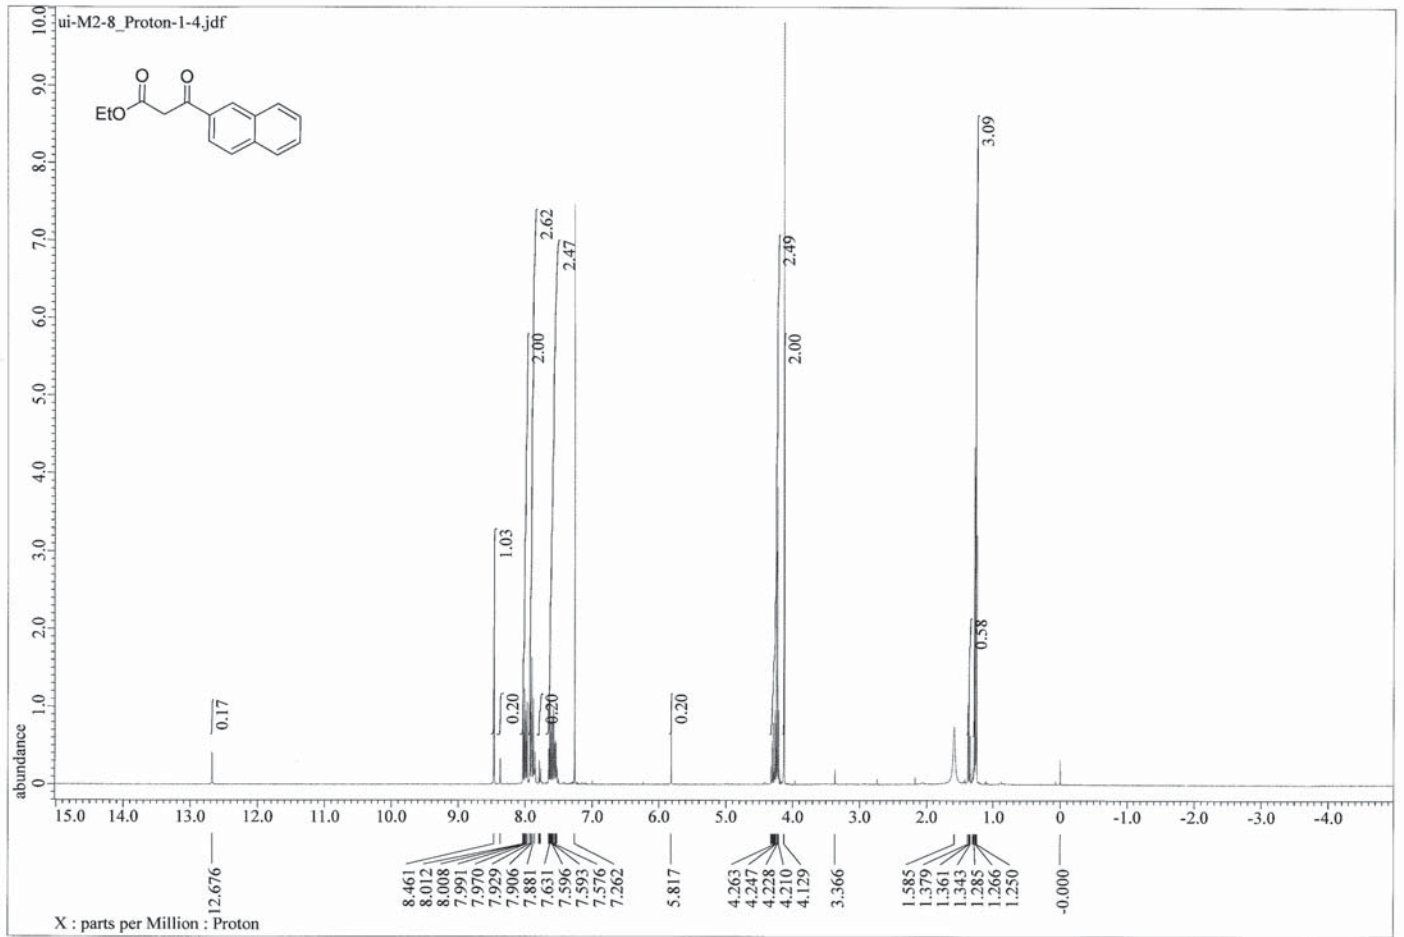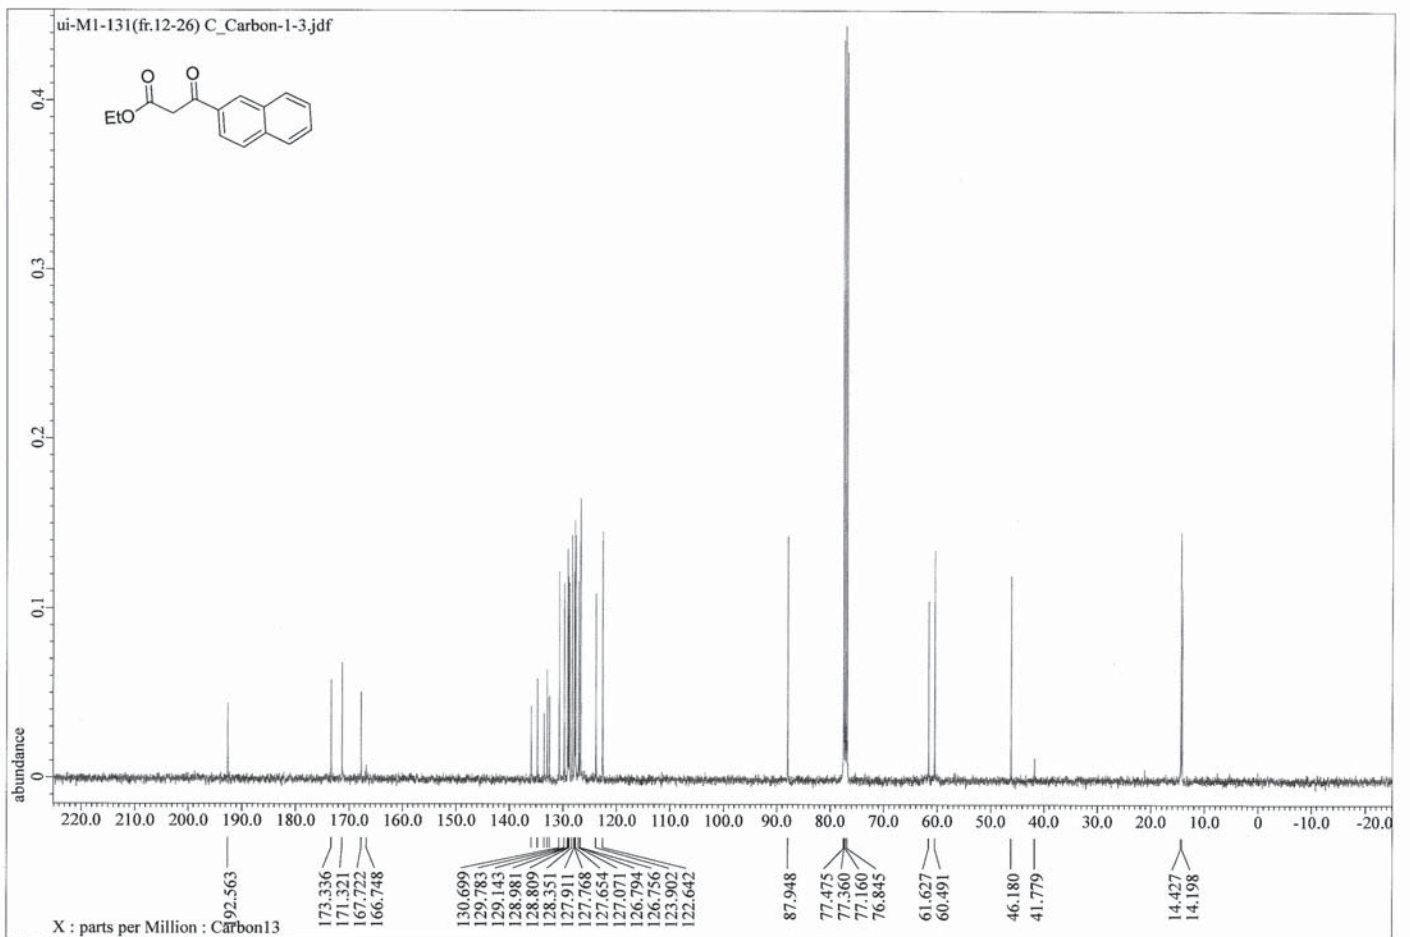

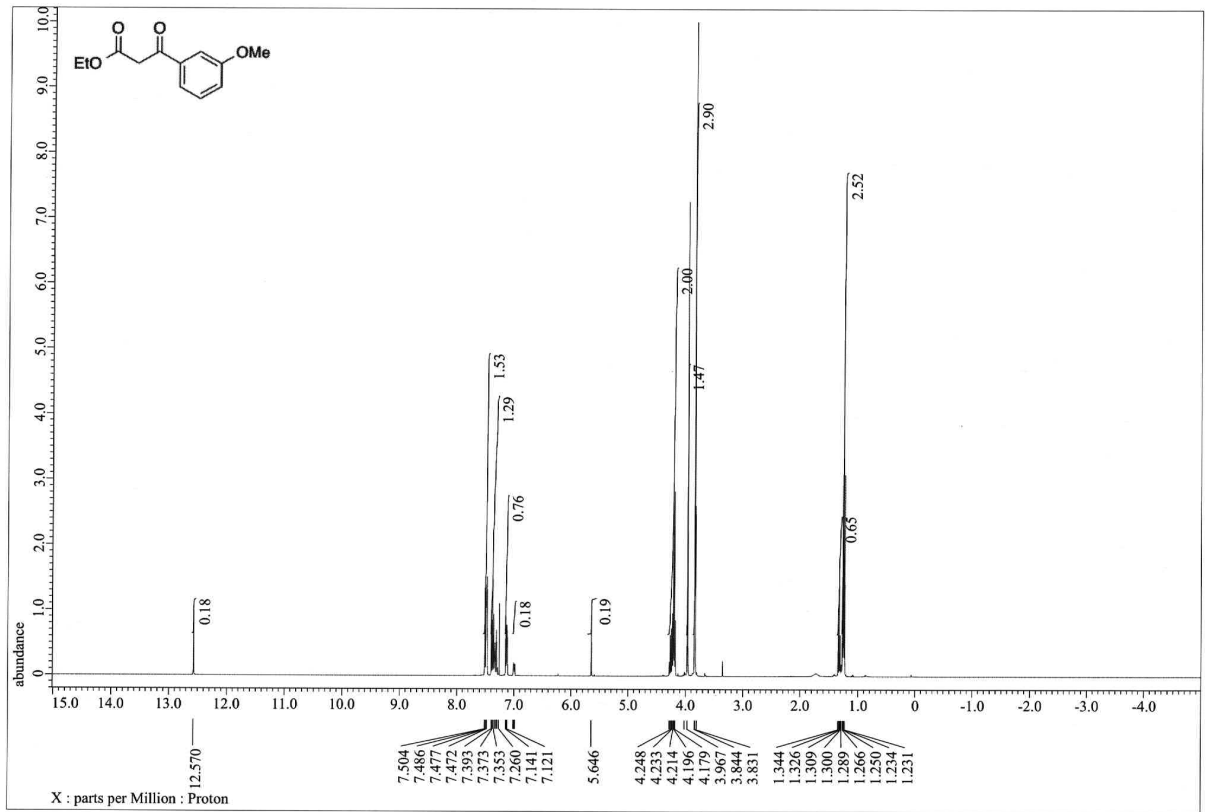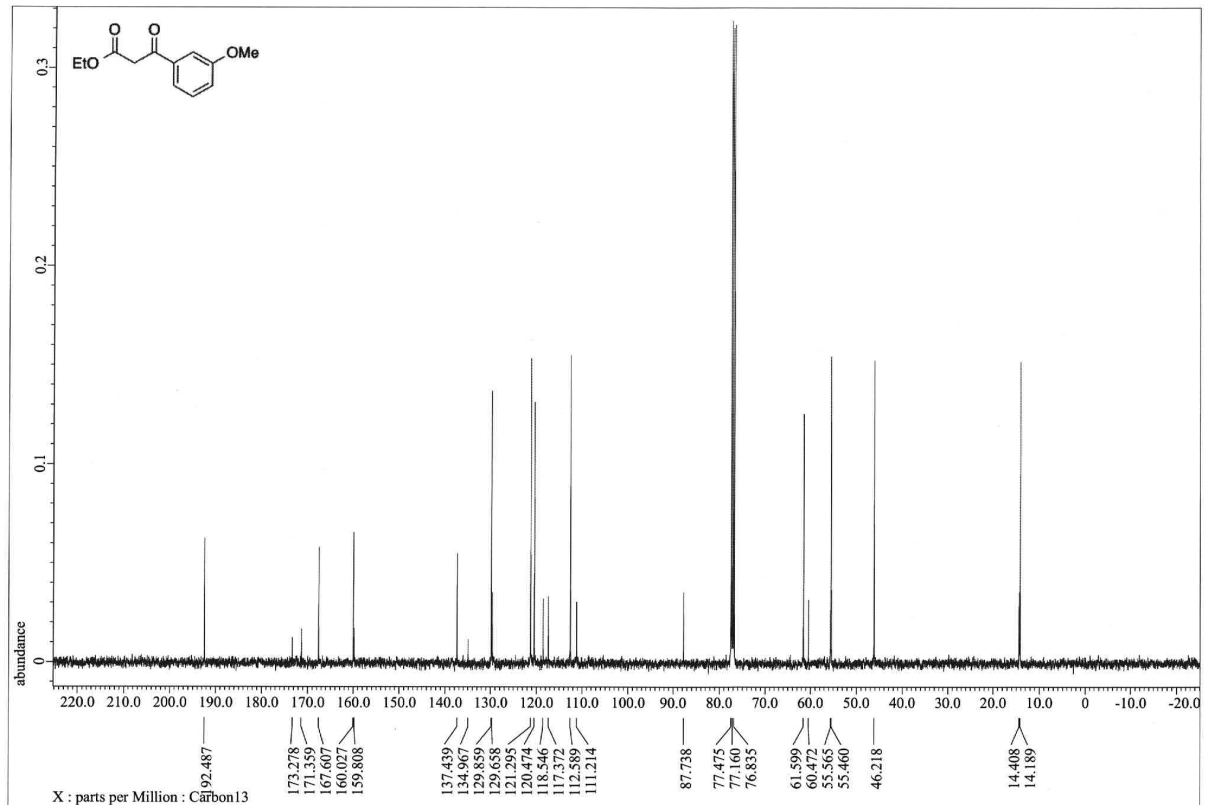

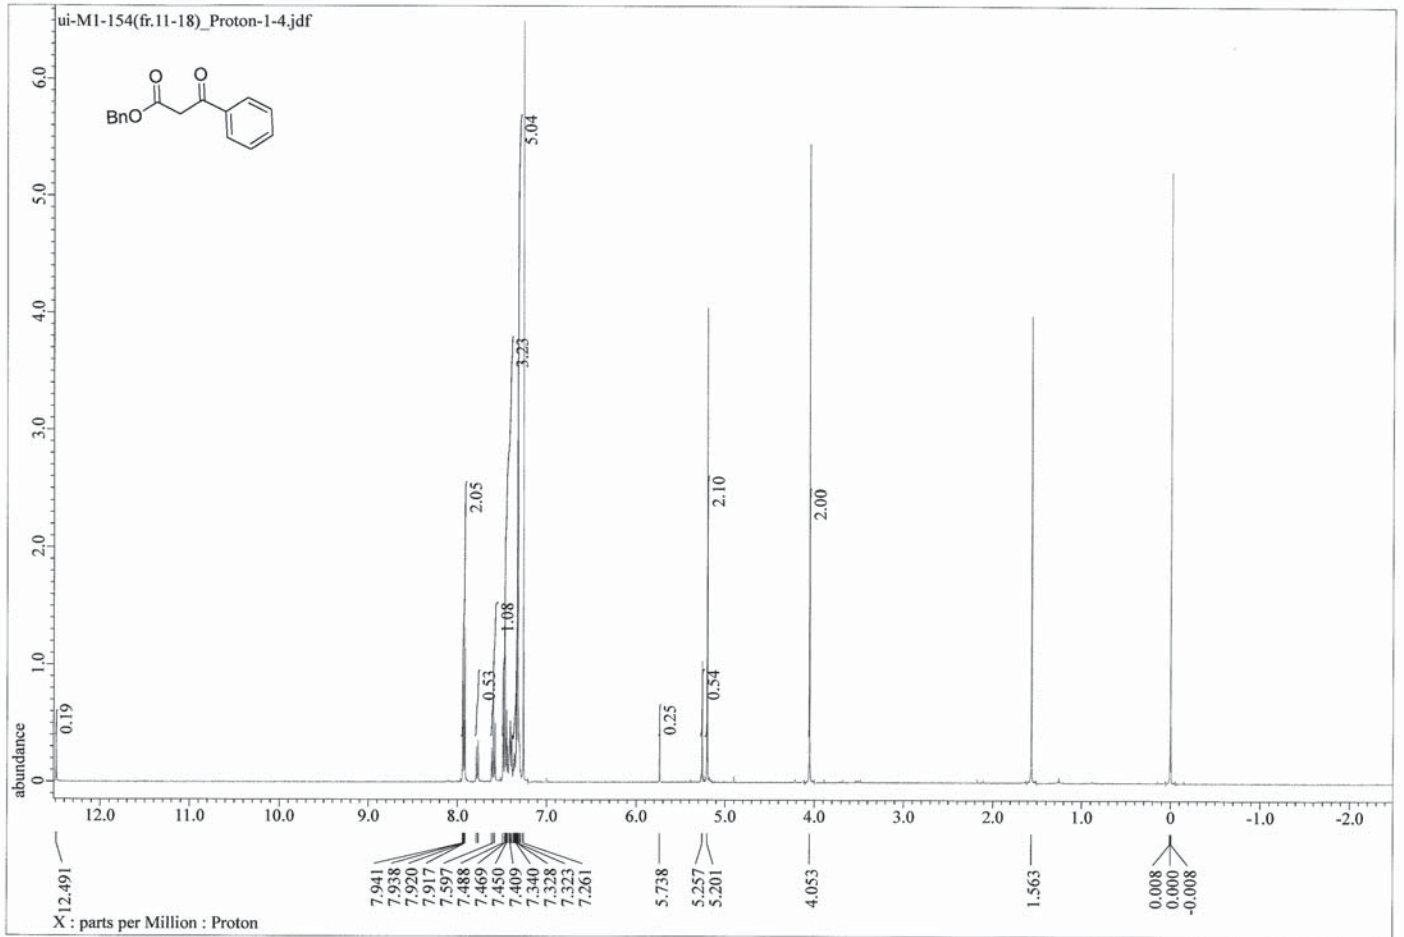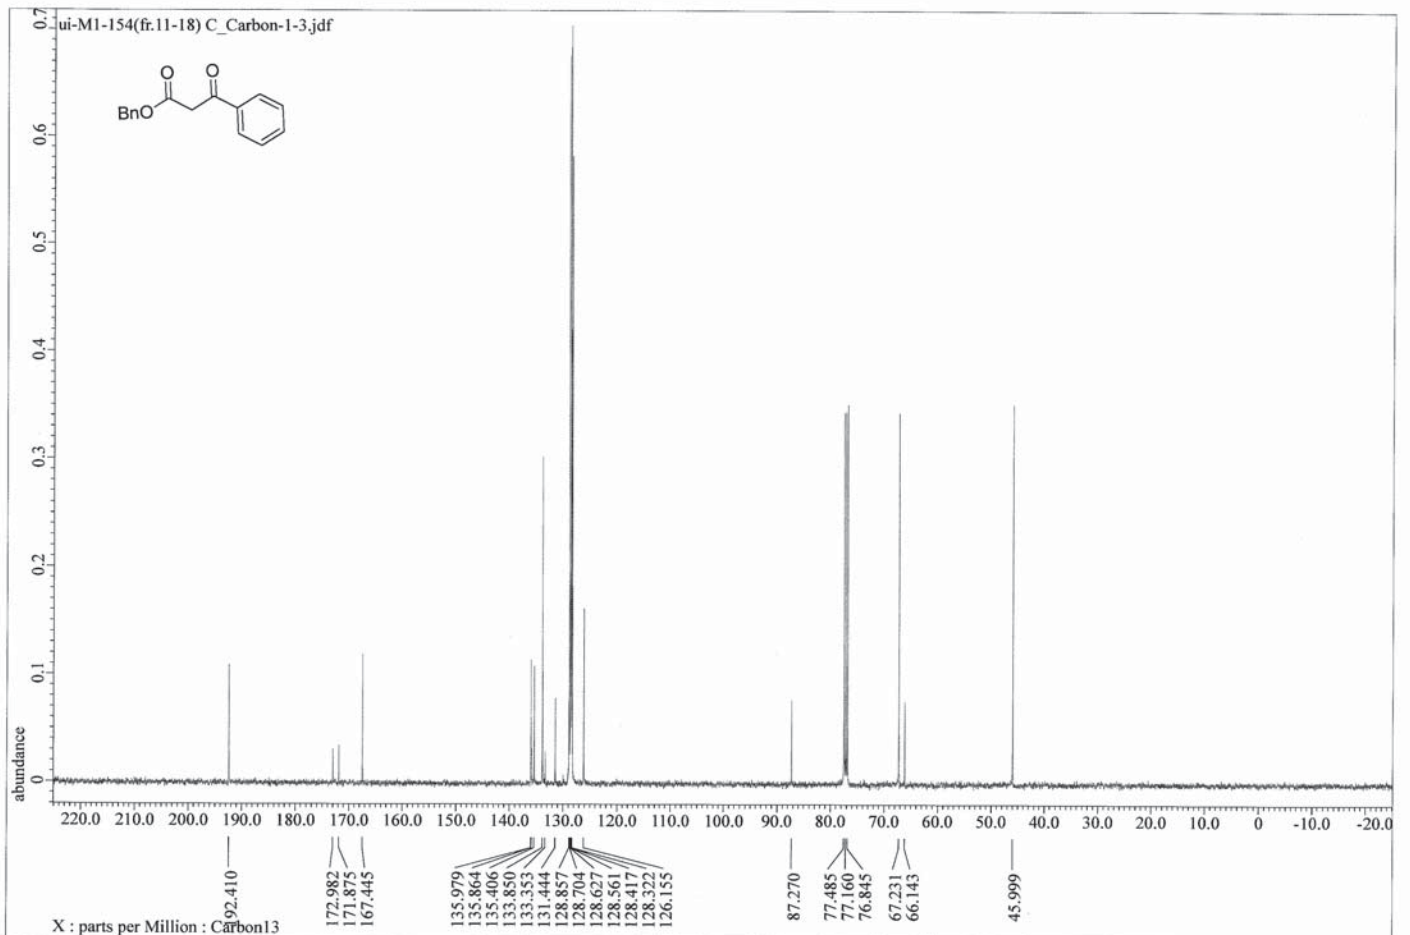

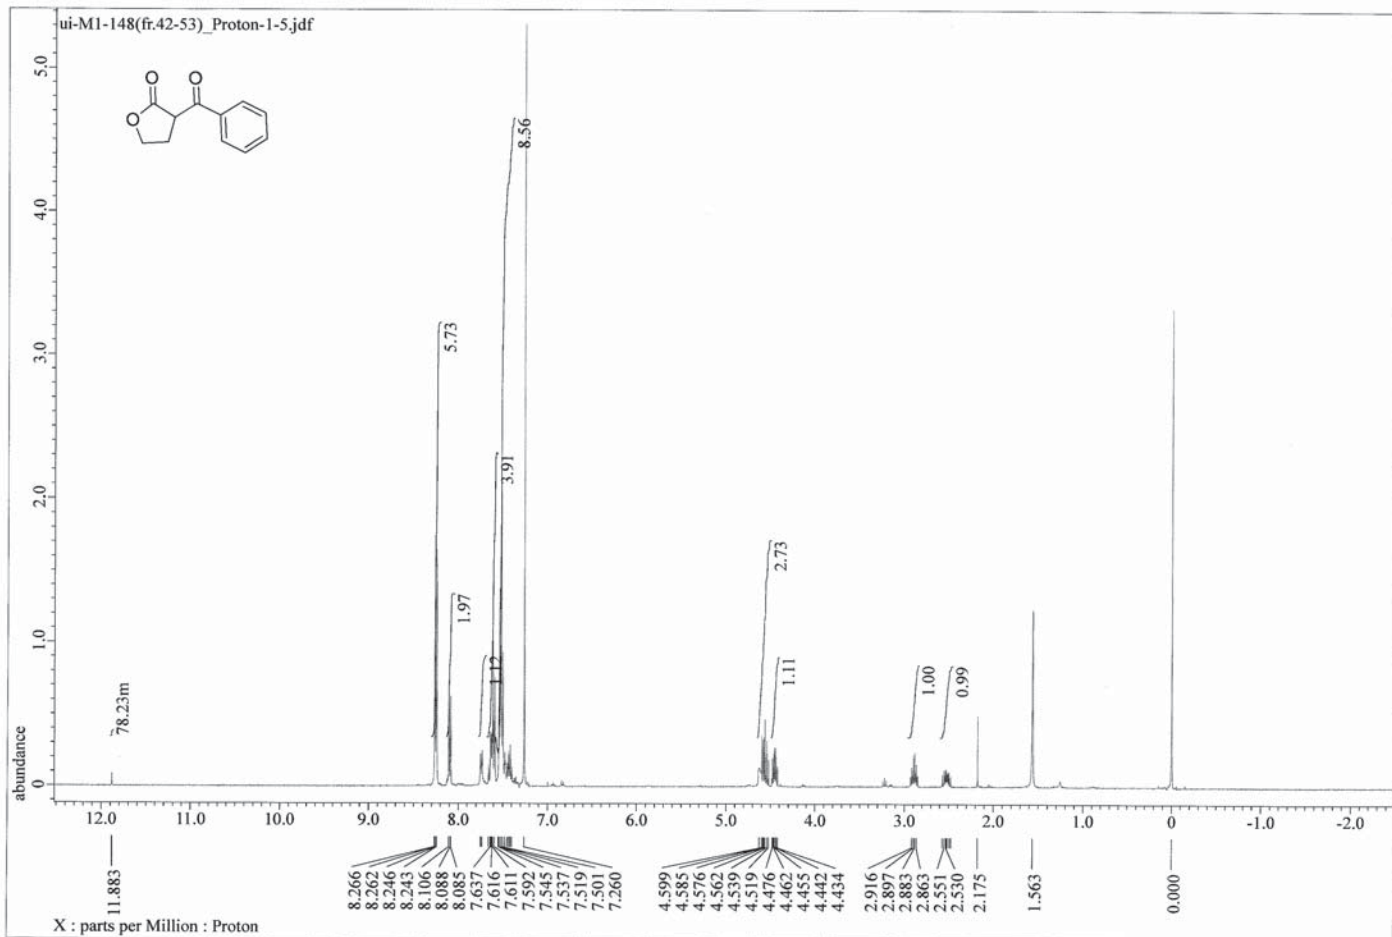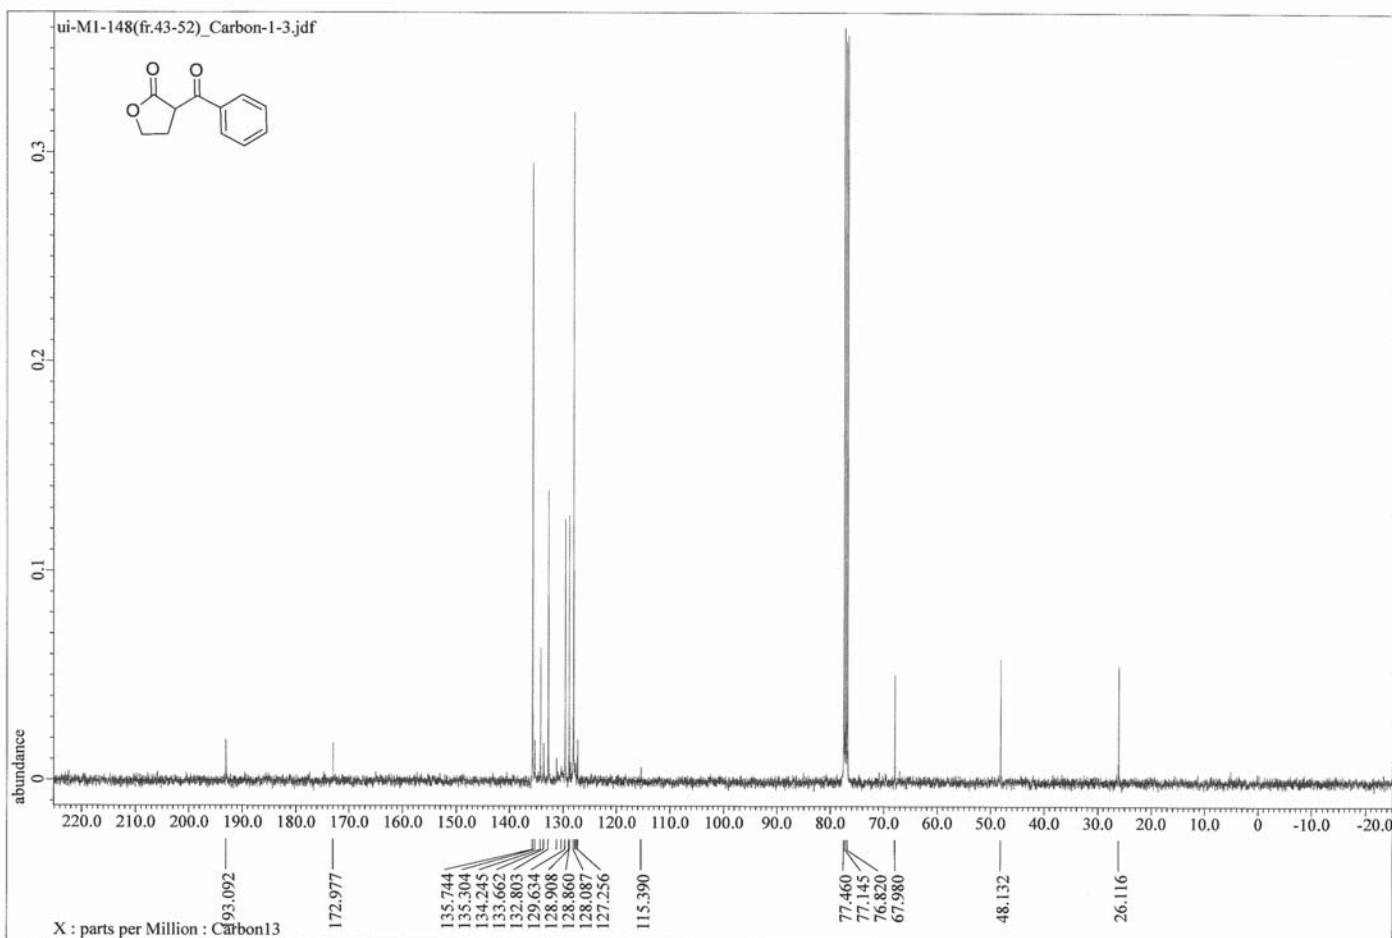

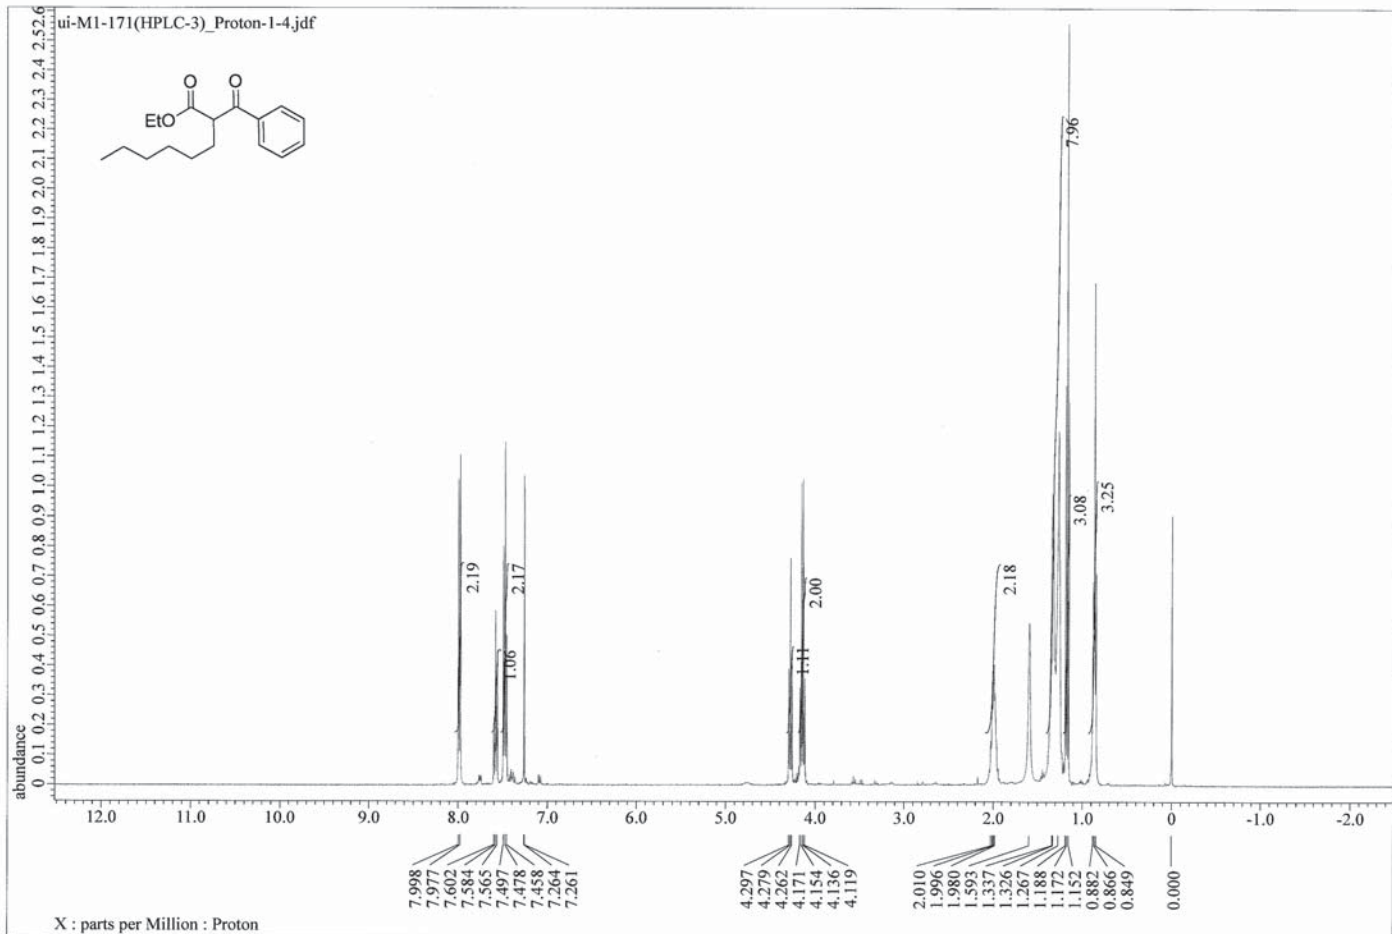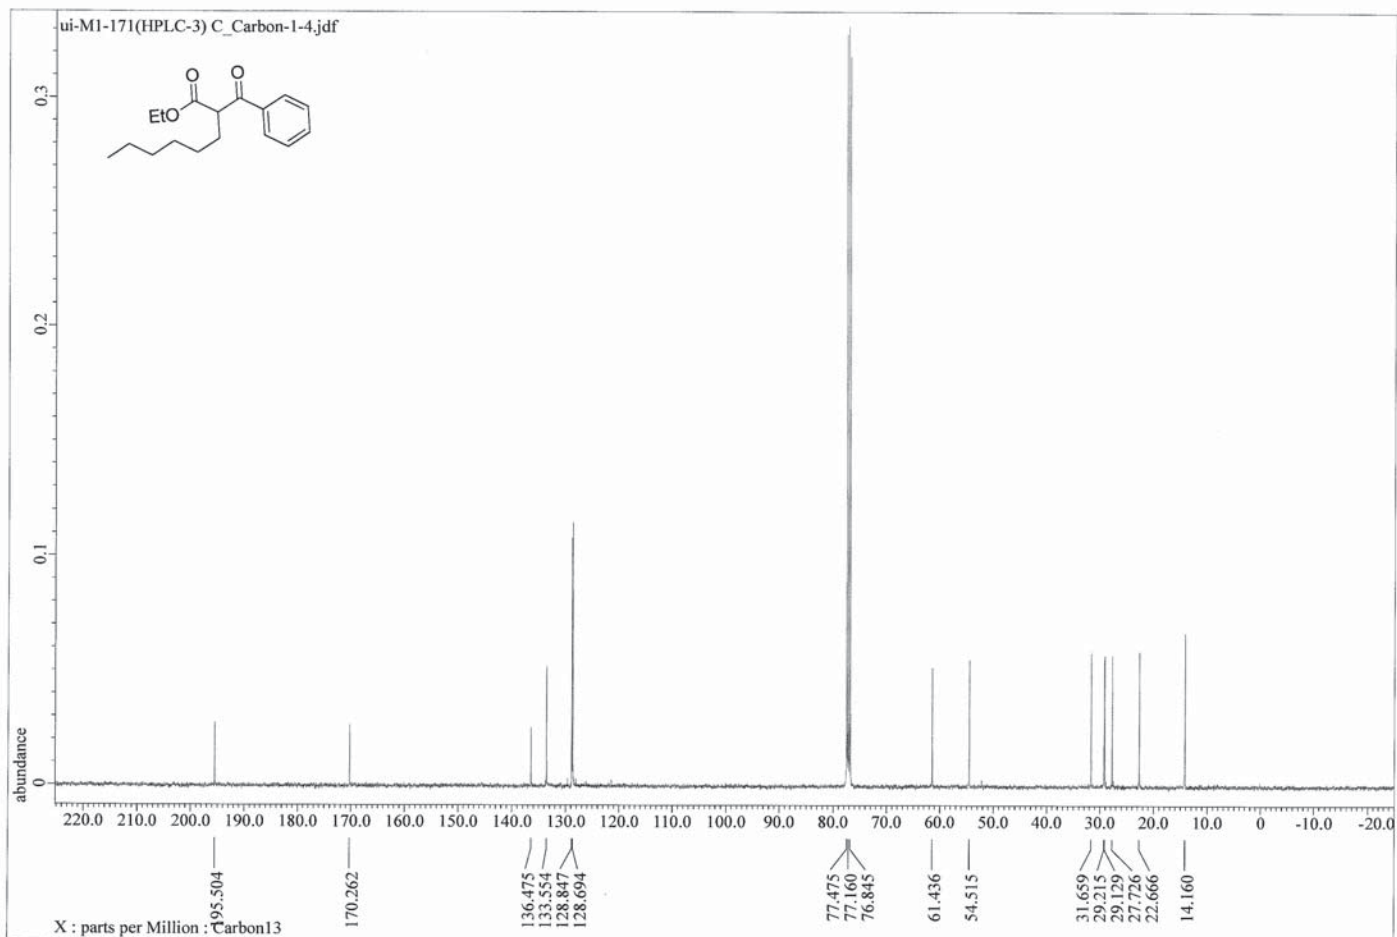



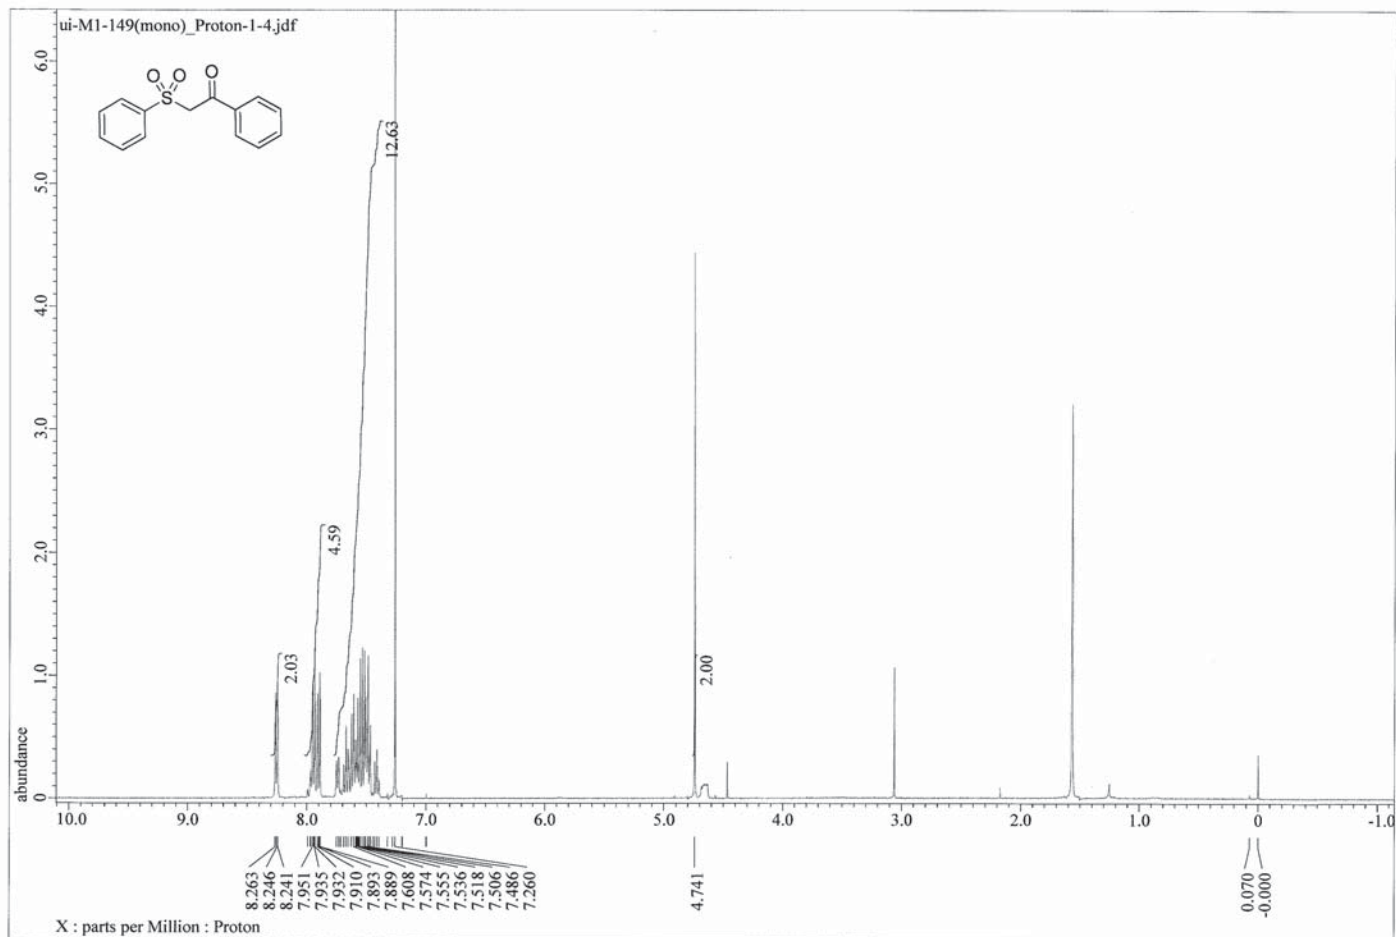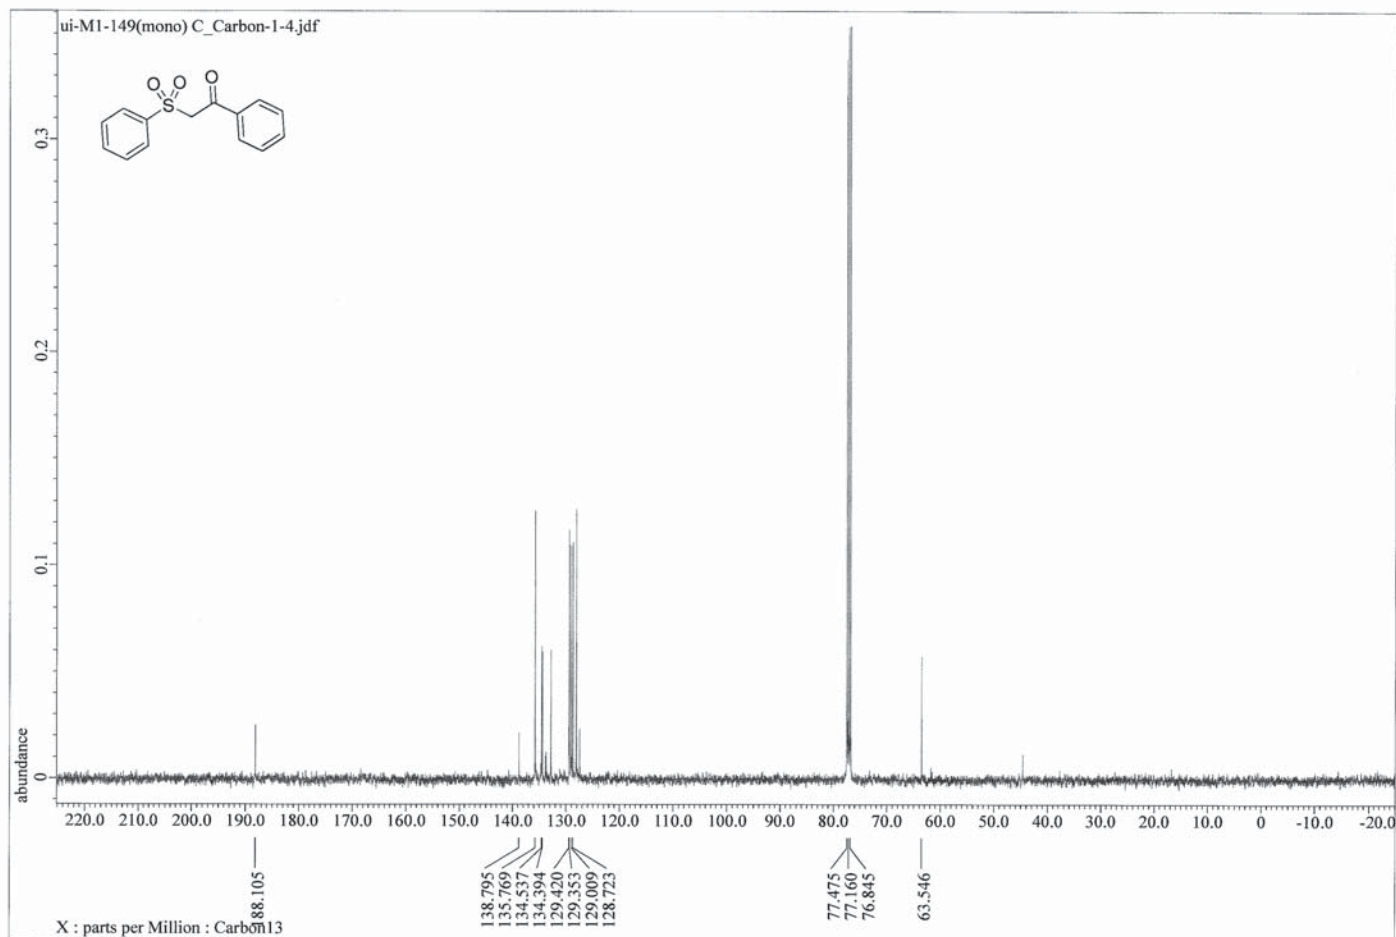



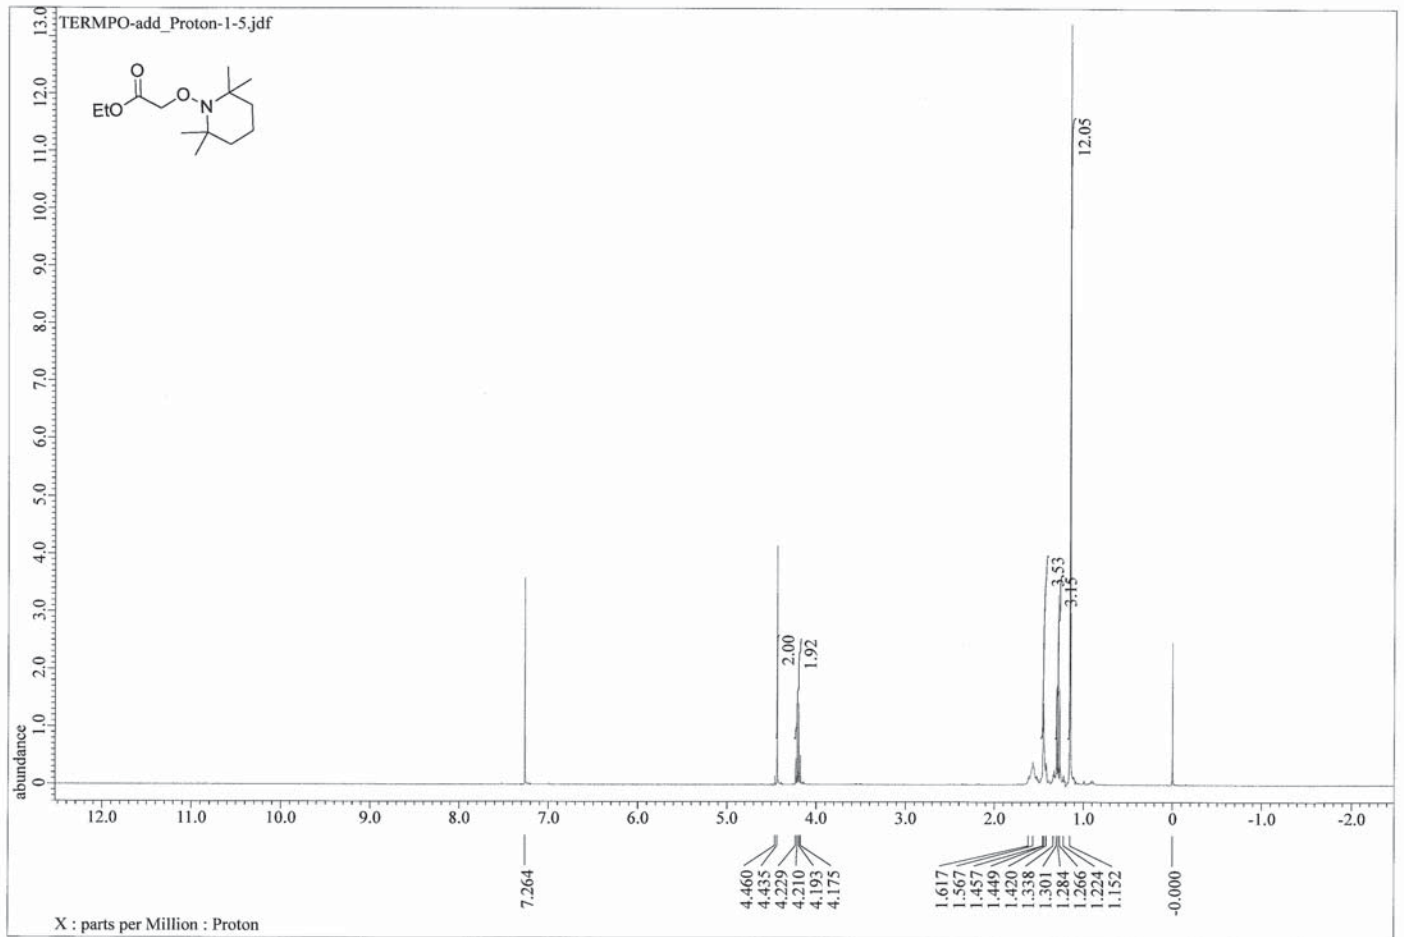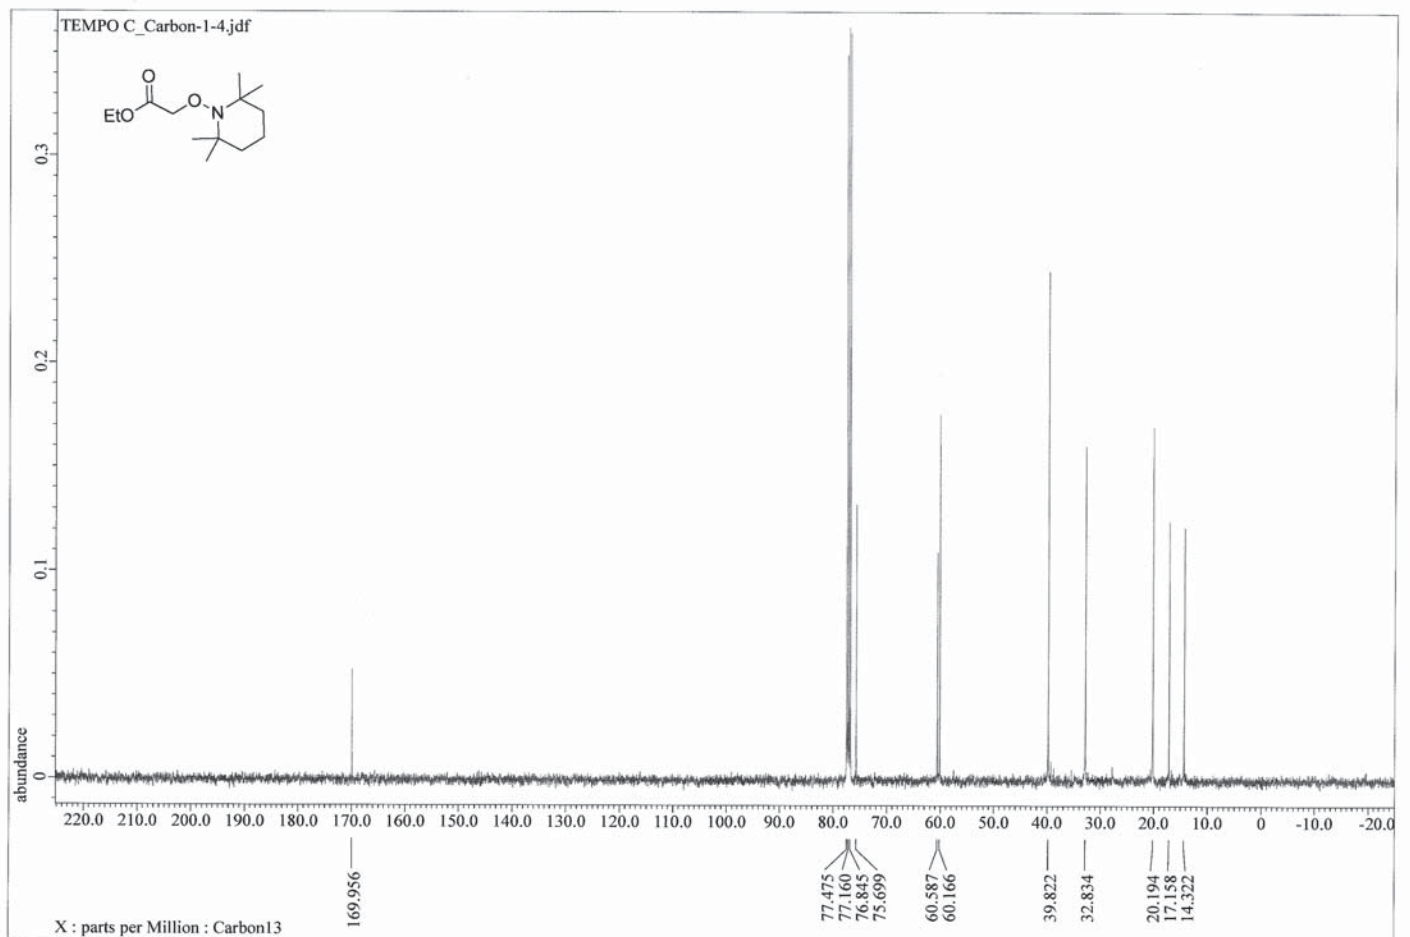

Supplement: c5qo00185d1.pdf [file c5qo00185d1.pdf]
